# Supplementary material for: DDQ-promoted direct transformation of benzyl hydrocarbons to amides via tandem reaction of the CDC reaction and Beckmann rearrangement
Source: Royal Society of Chemistry journal article supplement (doi:10.1039/c3ob41218k), 2013-01-01

## Supporting Information

### DDQ-Promoted direct Transformation of Benzyl Hydrocarbons to Amides under Transition Metal-Free Conditions

Jun Qiu and Ronghua Zhang\*

*Department of Chemistry, Tongji University, Shanghai 200092, P. R. China*

*E-mail: rhzhang@tongji.edu.cn*

|                                                  |            |
|--------------------------------------------------|------------|
| <b>1. General Methods .....</b>                  | <b>S-2</b> |
| <b>2. Experimental Procedure.....</b>            | <b>S-2</b> |
| <b>3. Characterization of the Compounds.....</b> | <b>S-3</b> |
| <b>4. References.....</b>                        | <b>S-7</b> |
| <b>5. NMR Charts.....</b>                        | <b>S-8</b> |

## 1. General Methods

Unless stated otherwise, all reagents were purchased commercially without further purification. All reagents were weighed and handled in air at room temperature. All glassware was oven or flame dried immediately prior to use.

$^1\text{H}$  NMR and  $^{13}\text{C}$  NMR were obtained at 400 MHz and recorded relative to the tetramethylsilane signal (0 ppm) or residual protio-solvent. Chemical shifts are expressed in parts per million values ( $\delta$ , ppm).  $^1\text{H}$  NMR spectra were calibrated with DMSO- $d_6$  ( $\delta$  = 2.50 ppm) and  $\text{CDCl}_3$  ( $\delta$  = 7.26 ppm).  $^{13}\text{C}$ -NMR spectra were obtained at 100 MHz and were calibrated with DMSO- $d_6$  ( $\delta$  = 39.50 ppm) and  $\text{CDCl}_3$  ( $\delta$  = 77.00 ppm). Data for  $^1\text{H}$  NMR are recorded as follows: chemical shift ( $\delta$ , ppm), multiplicity (s = singlet, d = doublet, t = triplet, q = quartet, m = multiplet or unresolved, br = broad singlet, coupling constant(s) in Hz, integration). Mass spectra were recorded using a PE SCLEX QSTAR spectrometer. Purification was done by column chromatography on silica gel (200–300 mesh) with petroleum ether and ethyl acetate as the eluent to give the pure product.

## 2. General procedure

### 2.1 Synthesis of amides from 1, 3-diarylpropene and diarylmethane:

**Condition A:** An oven-dried Schlenk tube was charge with **1a-o** (0.5 mmol),  $\text{NH}_2\text{-OH.HCl}$  (0.108g, 1.5 mmol), DDQ (0.34 g, 1.5mmol), PPA (0.052g, 0.15mmol),  $\text{HCOOH}$  (1.5 mL) and  $\text{CH}_3\text{CN}$  (1.5 mL). The reaction mixture was stirred at 80 °C for 12 h monitored by TLC. The mixture was allowed to cool to room temperature and was quenched with  $\text{H}_2\text{O}$  (10 mL). The mixture was extracted with DCM ( $3 \times 10$  mL), and the organic layer was washed with brine (10mL). The combined organic layers were dried with  $\text{Na}_2\text{SO}_4$ , concentrated under reduced pressure, and dried under high vacuum. The residue was purified by flash chromatography on silica gel (petroleum ether/ethyl acetate, 15:1 to 8:1) to obtain the desired products **2a-o**.

### 2.2 Synthesis of amides from diarylmethane:

**Condition B:** An oven-dried Schlenk tube was charge with **3a-h** (1.5 mmol),  $\text{NH}_2\text{-OH.HCl}$  (0.035g, 0.5 mmol), DDQ (0.34 g, 1.5mmol),  $\text{AlCl}_3$  (0.052g, 0.15mmol),  $\text{HCOOH}$  (1.5 mL) and  $\text{CH}_3\text{CN}$  (1.5 mL). The reaction mixture was stirred at 80°C for 12 h monitored by TLC. The mixture was allowed to cool to room temperature and was quenched with  $\text{H}_2\text{O}$  (10 mL). The mixture was extracted with DCM ( $3 \times 10$  mL), and the organic layer was washed with brine (10mL). The combined organic layers were dried with  $\text{Na}_2\text{SO}_4$ , concentrated under reduced pressure, and dried under high vacuum. The residue was purified by flash chromatography on silica gel (petroleum ether/ethyl acetate, 15:1 to 8:1) to obtain the desired products **4a-h**.

### 2.3 Investigation of the mechanism and possible key intermediates:

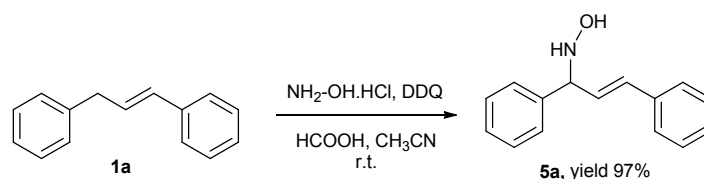

An oven-dried Schlenk tube was charge with **1a** (0.5 mmol),  $\text{NH}_2\text{-OH.HCl}$  (0.108g, 1.5 mmol), DDQ (0.114 g, 0.5mmol),  $\text{HCOOH}$  (1.5 mL) and  $\text{CH}_3\text{CN}$  (1.5 mL). The reaction mixture was stirred at room temperature for 12h monitored by TLC. The mixture was quenched with  $\text{H}_2\text{O}$  (10 mL). The mixture was extracted with DCM ( $3 \times 10$  mL), and the organic layer was washed with brine (10 mL). The combined organic layers were dried with  $\text{Na}_2\text{SO}_4$ , concentrated under reduced pressure, and dried under high vacuum. The residue was purified by flash chromatography on silica gel (petroleum ether/ethyl acetate, 4:1) to obtain the desired products **5a** (97% yield).

### **N-[1, 3-Diphenyl-(2E)-propenyl] hydroxylamine (5a)**<sup>1</sup>

$^1\text{H}$  NMR (400 MHz,  $\text{CDCl}_3$ , ppm):  $\delta$  7.43-7.31 (m, 9H), 7.26-7.19 (m, 1H), 6.64(d,  $J$  = 15.6Hz, 1H), 6.39 (dd,  $J$  = 7.6, 12.0 Hz, 1H), 5.43 (br, 1H), 4.74(d,  $J$  = 7.6Hz, 1H).  $^{13}\text{C}$  NMR (101 MHz,  $\text{CDCl}_3$ , ppm):  $\delta$  139.9, 136.6, 132.8, 156.1, 128.7, 128.6, 128.5, 127.9, 127.8, 126.5, 69.2.

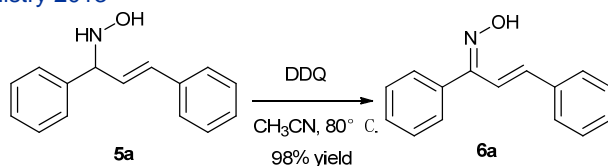

An oven-dried Schlenk tube was charge with **5a** (0.5 mmol), DDQ (0.227 g, 1mmol), CH<sub>3</sub>CN (2 mL). The reaction mixture was stirred at 80 °C for 4 h monitored by TLC. The mixture was allowed to cool to room temperature and was quenched with H<sub>2</sub>O (10 mL). The mixture was extracted with DCM (3 × 10 mL), and the organic layer was washed with brine (10 mL). The combined organic layers were dried with Na<sub>2</sub>SO<sub>4</sub>, concentrated under reduced pressure, and dried under high vacuum. The residue was purified by flash chromatography on silica gel (petroleum ether/ethyl acetate, 8:1) to obtain the desired products **6a** (98% yield).

#### (1E,2E)-Chalcone O-acetyloxime (**6a**)<sup>2</sup>

<sup>1</sup>H NMR (400 MHz, CDCl<sub>3</sub>, ppm): δ 8.93 (br, 1H), 7.71 (d, *J* = 16.4Hz, 1H), 7.57-7.47 (m, 7H), 7.40-7.34 (m, 3H), 6.84(d, *J* = 16.4Hz, 1H). <sup>13</sup>C NMR (101 MHz, CDCl<sub>3</sub>, ppm): δ 157.8, 139.7, 136.2, 134.8, 129.3, 129.2, 128.8, 128.5, 127.5, 117.5.

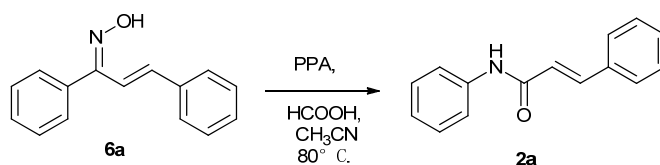

An oven-dried Schlenk tube was charge with **6a** (0.5 mmol), PPA (0.052 g, 0.15mmol), HCOOH (1.5 mL) and CH<sub>3</sub>CN (1.5 mL). The reaction mixture was stirred at room temperature for 12h monitored by TLC. The mixture was quenched with H<sub>2</sub>O (10 mL). The mixture was extracted with DCM (3 × 10 mL), and the organic layer was washed with brine (10 mL). The combined organic layers were dried with Na<sub>2</sub>SO<sub>4</sub>, concentrated under reduced pressure, and dried under high vacuum. The residue was purified by flash chromatography on silica gel (petroleum ether/ethyl acetate, 15:1) to obtain the desired products **2a** (91% yield).

### 3. Characterization of the Compounds

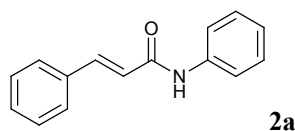

#### N-Phenylcinnamamide (**2a**)<sup>3</sup>

Condition A. Eluent: petroleum ether/ethyl acetate (15:1). White solid (83% yield); **2a** <sup>1</sup>H NMR (400 MHz, CDCl<sub>3</sub>, ppm): 7.79 (d, *J* = 15.6 Hz, 1H), 7.66-7.64 (m, 2H), 7.57-7.55 (m, 2H), 7.44-7.36 (m, 5H), 7.16 (t, *J* = 7.2 Hz, 1H), 6.59 (d, *J* = 15.6 Hz, 1H). <sup>13</sup>C NMR (101 MHz, CDCl<sub>3</sub>, ppm): δ 164.4, 142.3, 138.1, 134.6, 129.9, 129.1, 128.9, 128.0, 124.5, 121.0, 120.2. HRMS *m/z* (ESI) calcd. for C<sub>15</sub>H<sub>14</sub>NO (M+Na)<sup>+</sup>: 246.0895, found 246.0893.

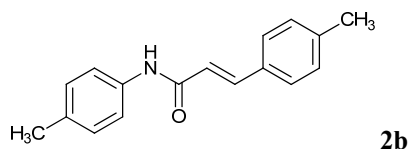

#### (E)- N, 3-Di- *p*-tolylacrylamide (**2b**)<sup>3</sup>

Condition A. Eluent: petroleum ether/ethyl acetate (15:1). White solid (89% yield); **2b** <sup>1</sup>H NMR (400 MHz, CDCl<sub>3</sub>, ppm): δ 7.72 (d, *J* = 15.6 Hz, 1H), 7.50 (d, *J* = 6.8 Hz, 2H), 7.42 (d, *J* = 7.6 Hz, 2H), 7.33 (s, 1H), 7.19-7.14 (m, 4H), 6.49 (d, *J* = 15.6 Hz, 1H), 2.37 (s, 3H), 2.33 (s, 3H). <sup>13</sup>C NMR (101MHz, CDCl<sub>3</sub>, ppm): δ 164.1, 142.1, 140.2, 135.5, 134.0, 132.0, 129.6, 127.9, 120.0, 21.4, 20.9. HRMS *m/z* (ESI) calcd. for C<sub>17</sub>H<sub>17</sub>NO (M+Na)<sup>+</sup>: 274.1208, found 274.1190.

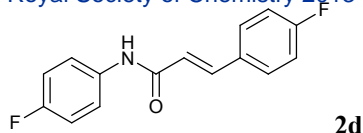

**(E)- N, 3-Bis(4-fluorophenyl)acrylamide (2d)<sup>3</sup>**

Condition A. Eluent: petroleum ether/ethyl acetate (15:1). White solid (78% yield); **2d** <sup>1</sup>H NMR (400 MHz, CDCl<sub>3</sub>, ppm): δ 7.73 (d, *J* = 15.6 Hz, 1H), 7.60-7.50(m, 5H), 7.07 (dd, *J* = 18.4, 9.2 Hz, 4H), 6.49 (d, *J* = 15.6 Hz, 1H). <sup>13</sup>C NMR (101 MHz, CDCl<sub>3</sub>, ppm): δ 165.0, 163.9, 162.5, 160.7, 141.3, 133.9, 130.8, 130.7, 129.8, 129.7, 121.8, 120.3, 116.2, 115.9, 115.9, 115.7. HRMS *m/z* (ESI) calcd. for C<sub>15</sub>H<sub>11</sub>F<sub>2</sub>NO (M+Na)<sup>+</sup>: 282.0706, found 282.0701.

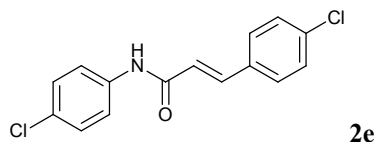

**(E)- N, 3-Bis(4-chlorophenyl)acrylamide (2e)<sup>3</sup>**

Condition A. Eluent: petroleum ether/ethyl acetate (15:1). White solid (85% yield); **2e** <sup>1</sup>H NMR (400 MHz, CDCl<sub>3</sub>, ppm): δ 7.73 (d, *J* = 15.6 Hz, 1H), 7.59 (d, *J* = 8.0 Hz, 2H), 7.49-7.33 (m, 7H), 6.52 (d, *J* = 15.6 Hz, 1H). <sup>13</sup>C NMR (101 MHz, DMSO-*d*<sub>6</sub>, ppm): δ 163.9, 139.6, 138.6, 134.8, 134.1, 129.9, 129.5, 129.2, 127.5, 123.3, 121.2. HRMS *m/z* (ESI) calcd. for C<sub>15</sub>H<sub>11</sub>Cl<sub>2</sub>NO (M+Na)<sup>+</sup>: 314.0115, found 314.0113.

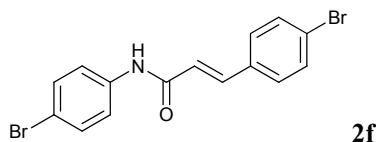

**(E)- N, 3-Bis(4-bromophenyl)acrylamide (2f)**

Condition A. Eluent: petroleum ether/ethyl acetate (15:1). White solid (82% yield); **2f** <sup>1</sup>H NMR (400 MHz, CDCl<sub>3</sub>, ppm): δ 7.72 (d, *J* = 15.6 Hz, 1H), 7.56-7.47 (m, 6H), 7.41 (d, *J* = 8.4 Hz, 1H), 7.36 (br, 1H), 6.53 (d, *J* = 15.2 Hz, 1H), 7.36 (br, 1H). <sup>13</sup>C NMR (101 MHz, DMSO-*d*<sub>6</sub>, ppm): δ 163.9, 139.7, 139.0, 134.4, 132.5, 132.1, 130.2, 123.5, 123.3, 121.6, 115.5. HRMS *m/z* (ESI) calcd. for C<sub>15</sub>H<sub>11</sub>Br<sub>2</sub>NO (M+Na)<sup>+</sup>: 403.9085, found 403.9095.

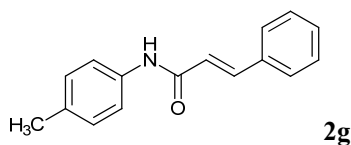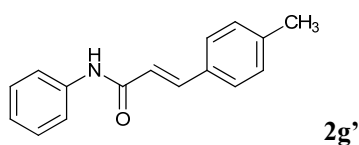

**N- p-Tolylcinnamamide (2g)<sup>4</sup>**

**(E)-3-(p-Tolyl)-N-phenylacrylamide (2g')**

Condition A. Eluent: petroleum ether/ethyl acetate (15:1). White solid (86% yield); **2g**: <sup>1</sup>H NMR (400 MHz, CDCl<sub>3</sub>, ppm): δ 7.77 (d, *J* = 15.6 Hz, 1H), 7.64 (d, *J* = 7.6 Hz, 1H), 7.54(br, 1H), 7.46-7.35 (m, 5H), 7.22-7.14 (m, 3H), 6.58 (d, *J* = 15.6 Hz, 1H), 2.35(s, 3H). **2g'**: <sup>1</sup>H NMR (400 MHz, CDCl<sub>3</sub>, ppm): δ 7.76 (d, *J* = 15.6 Hz, 1H), 7.64 (d, *J* = 6.4 Hz, 1H), 7.45 (d, *J* = 7.6 Hz, 2H), 7.40 (br, 1H), 7.37 (t, *J* = 8.0 Hz, 2H), 7.21(d, *J* = 7.6 Hz, 2H), 7.15 (t, *J* = 7.2 Hz, 1H), 6.53 (d, *J* = 15.6 Hz, 1H), 2.40 (s, 1H). <sup>13</sup>C NMR (101 MHz, CDCl<sub>3</sub>, ppm): δ 164.1, 163.7, 140.4, 140.6, 140.1, 139.8, 132.5, 130.2, 129.6, 129.5, 130.1, 129.2, 128.2, 123.7, 123.5, 121.7, 119.7, 21.4, 21.0. HRMS *m/z* (ESI) calcd. for C<sub>16</sub>H<sub>15</sub>NO (M+Na)<sup>+</sup>: 260.1051, found 260.1048.

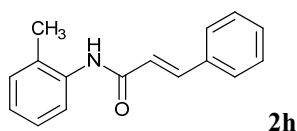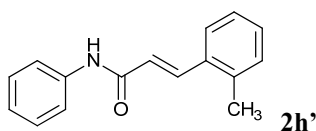

**N- o-Tolylcinnamamide (2h)<sup>5</sup>**

**(E)-3-(o-Tolyl)-N-phenylacrylamide (2h')**

Condition A. Eluent: petroleum ether/ethyl acetate (15:1). White solid (64% yield); **2h**: <sup>1</sup>H NMR (400

MHz, CDCl<sub>3</sub>, ppm): δ 8.08 (d, *J* = 15.2 Hz, 1H), 7.67(m, 3H), 7.55(d, *J* = 7.2 Hz, 1H), 7.37 (t, *J* = 8.0 Hz, 2H), 7.23-7.14 (m, 3H), 6.51 (d, *J* = 15.6 Hz, 1H), 2.45(s, 3H). **2h'**: <sup>1</sup>H NMR (400 MHz, CDCl<sub>3</sub>, ppm): δ 8.00 (br, 1H), 7.79 (d, *J* = 15.6 Hz, 1H), 7.57 (s, 2H), 7.40 (s, 3H), 7.27-7.14 (m, 4H), 6.62 (d, *J* = 15.2 Hz, 1H), 2.34 (s, 1H). <sup>13</sup>C NMR (101 MHz, CDCl<sub>3</sub>, ppm): δ 164.2, 163.9, 142.4, 140.2, 138.1, 137.8, 136.0, 135.8, 134.7, 133.7, 130.8, 130.5, 129.9, 129.7, 129.1, 128.9, 128.0, 126.9, 126.2, 124.4, 122.0, 120.0, 100.0, 19.8, 17.8. HRMS *m/z* (ESI) calcd. for C<sub>16</sub>H<sub>15</sub>NO (M+Na)<sup>+</sup>: 260.1051, found 260.1036.

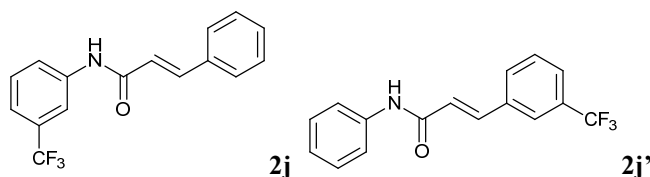

***N*-(3-(Trifluoromethyl)phenyl)cinnamamide (2j)**

**(*E*)-3-(3-(Trifluoromethyl)phenyl)-*N*-phenylacrylamide (2j')**

Condition A. Eluent: petroleum ether/ethyl acetate (15:1). White solid (75% yield); **2j**: <sup>1</sup>H NMR (400 MHz, CDCl<sub>3</sub>, ppm): δ 8.38(br, 1H), 7.93 (s, 1H), 7.86(d, *J* = 8.0 Hz, 1H), 7.76 (d, *J* = 15.6 Hz, 1H), 7.43-7.30 (m, 7H), 6.65 (d, *J* = 15.6 Hz, 1H). **2j'**: <sup>1</sup>H NMR (400 MHz, CDCl<sub>3</sub>, ppm): δ 8.25(br, 1H), 7.93 (s, 1H), 7.86(d, *J* = 8.0 Hz, 1H), 7.76 (d, *J* = 15.6 Hz, 1H), 7.43-7.30 (m, 7H), 6.64 (d, *J* = 15.6 Hz, 1H). <sup>13</sup>C NMR (101 MHz, CDCl<sub>3</sub>, ppm): δ 164.7, 143.2, 138.6, 134.3, 131.9, 131.6, 131.3, 130.9, 130.2, 129.6, 128.9, 128.0, 125.2, 123.2, 122.5, 121.0, 121.0, 120.3, 116.9. HRMS *m/z* (ESI) calcd. for C<sub>16</sub>H<sub>12</sub>F<sub>3</sub>NO (M+Na)<sup>+</sup>: 314.0769, found 324.0747.

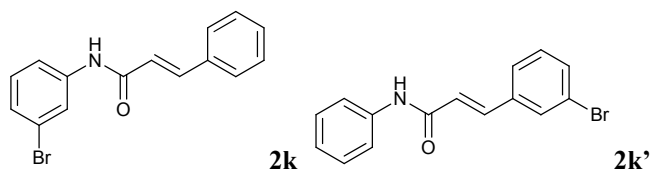

***N*-(3-Bromophenyl)cinnamamide (2k)<sup>6</sup>**

**(*E*)-3-(3-Bromophenyl)-*N*-phenylacrylamide (2k')**

Condition A. Eluent: petroleum ether/ethyl acetate (15:1). White solid (68% yield); **2k**: <sup>1</sup>H NMR (400 MHz, CDCl<sub>3</sub>, ppm): δ 7.93 (d, *J* = 16.0 Hz, 1H), 7.65(d, *J* = 6.0 Hz, 1H), 7.49(d, *J* = 7.6 Hz, 2H), 7.39-7.34 (m, 3H), 7.27-7.14 (m, 3H), 6.57 (d, *J* = 15.6 Hz, 1H). **2k'**: <sup>1</sup>H NMR (400 MHz, CDCl<sub>3</sub>, ppm): δ 7.85(br, 1H), 7.77 (d, *J* = 15.6 Hz, 1H), 7.70-7.64 (m, 2H), 7.59 (d, *J* = 8.0 Hz, 1H), 7.39-7.34 (m, 3H), 7.27-7.14 (m, 3H), 6.57 (d, *J* = 15.6 Hz, 1H). <sup>13</sup>C NMR (101 MHz, CDCl<sub>3</sub>, ppm): δ 164.4, 164.0, 142.9, 140.7, 139.5, 136.7, 134.4, 132.7, 130.5, 130.4, 130.3, 130.1, 129.1, 128.9, 128.0, 127.4, 126.7, 124.8, 123.2, 123.0, 122.7, 122.4, 120.6, 120.3, 118.7. HRMS *m/z* (ESI) calcd. for C<sub>15</sub>H<sub>12</sub>BrNO (M+Na)<sup>+</sup>: 325.9979, found 325.9969.

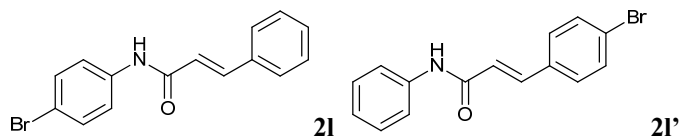

***N*-(4-Bromophenyl)cinnamamide (2l)<sup>7</sup>**

**(*E*)-3-(4-Bromophenyl)-*N*-phenylacrylamide (2l')**

Condition A. Eluent: petroleum ether/ethyl acetate (15:1). White solid (83% yield); **2l**: <sup>1</sup>H NMR (400 MHz, CDCl<sub>3</sub>, ppm): δ 7.77 (d, *J* = 15.2 Hz, 1H), 7.64 (d, *J* = 7.2 Hz, 1H), 7.56(br, 1H), 7.54-7.51 (m, 3H), 7.47 (d, *J* = 7.2 Hz, 1H), 7.40-7.35 (m, 3H), 6.57 (d, *J* = 15.6 Hz, 1H). **2l'**: <sup>1</sup>H NMR (400 MHz, CDCl<sub>3</sub>, ppm): δ 7.70 (d, *J* = 15.2 Hz, 1H), 7.56(br, 1H), 7.54-7.51 (m, 3H), 7.47 (d, *J* = 7.2 Hz, 1H), 7.40-7.35 (m, 2H), 7.16(d, *J* = 7.2 Hz, 1H), 6.57 (d, *J* = 15.2 Hz, 1H). <sup>13</sup>C NMR (101 MHz, DMSO-*d*<sub>6</sub>, ppm): δ 164.1, 163.8, 141.0, 139.7, 139.3, 139.1, 135.1, 134.5, 132.5, 132.1, 130.4, 130.1, 129.5, 129.3, 128.2, 123.4, 123.9, 123.7, 123.4, 122.4, 119.7, 115.4. HRMS *m/z* (ESI) calcd. for C<sub>15</sub>H<sub>12</sub>BrNO (M+Na)<sup>+</sup>: 324.0000, found 324.0022.

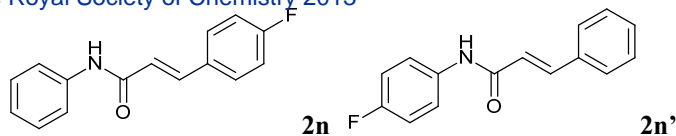

**N-(4-Fluorophenyl)cinnamamide (2n')**

**(E)-3-(4-Fluorophenyl)-N-phenylacrylamide (2n)<sup>4</sup>**

Condition A. Eluent: petroleum ether/ethyl acetate (15:1). White solid (76% yield); **2n**: <sup>1</sup>H NMR (400 MHz, CDCl<sub>3</sub>, ppm): δ 7.78(d, *J* = 15.6 Hz, 1H), 7.65-7.50 (m, 5H), 7.40-7.36 (m, 2H), 7.16 (t, *J* = 7.2 Hz, 1H), 7.10-7.04 (m, 2H), 6.58 (d, *J* = 15.6 Hz, 1H). **2n'**: <sup>1</sup>H NMR (400 MHz, CDCl<sub>3</sub>, ppm): δ 7.74 (d, *J* = 15.2 Hz, 1H), 7.65-7.50 (m, 5H), 7.40-7.36 (m, 3H), 7.10-7.04 (m, 2H), 6.52 (d, *J* = 15.6 Hz, 1H). <sup>13</sup>C NMR (101 MHz, CDCl<sub>3</sub>, ppm): δ 165.0, 164.1, 162.5, 142.5, 141.2, 141.0, 139.3, 137.9, 134.5, 134.1, 132.5, 132.1, 130.9, 130.1, 130.0, 129.8, 129.7, 129.5, 129.3, 129.1, 128.9, 128.2, 128.0, 124.6, 123.4, 122.4, 121.8, 120.6, 120.0, 119.7, 116.1, 115.9, 115.8, 115.6. HRMS *m/z* (ESI) calcd. for C<sub>15</sub>H<sub>12</sub>FNO (M+Na)<sup>+</sup>: 264.0801, found 264.0791.

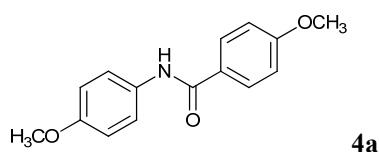

**4-Methoxy-N-(4-methoxyphenyl)benzamide (4a)<sup>8</sup>**

Condition B. Eluent: petroleum ether/ethyl acetate (8:1). White solid (96% yield); **4a**: <sup>1</sup>H NMR (400 MHz, DMSO-*d*<sub>6</sub>, ppm): δ 9.96 (s, 1H), 7.94 (d, *J* = 8.8 Hz, 2H), 7.65 (d, *J* = 9.2 Hz, 2H), 7.05 (d, *J* = 8.8 Hz, 2H), 6.91 (d, *J* = 8.8 Hz, 2H), 3.83 (s, 3H), 3.74 (s, 3H). <sup>13</sup>C NMR (101 MHz, DMSO-*d*<sub>6</sub>, ppm): δ 164.9, 162.2, 155.9, 132.9, 129.9, 127.5, 122.4, 114.2, 114.0, 55.9, 55.0. HRMS *m/z* (ESI) calcd. for C<sub>15</sub>H<sub>15</sub>NO<sub>3</sub> (M+Na)<sup>+</sup>: 280.0950, found 280.0948.

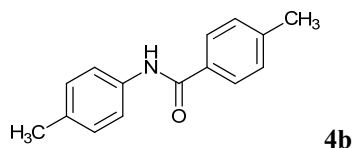

***p*-Tolyl-N-(*p*-tolyl)benzamide (4b)<sup>9</sup>**

Condition B. Eluent: petroleum ether/ethyl acetate (15:1). White solid (89% yield); **4b**: <sup>1</sup>H NMR (400 MHz, CDCl<sub>3</sub>, ppm): δ 7.79 (d, *J* = 8.4 Hz, 3H), 7.54 (d, *J* = 7.6 Hz, 2H), 7.30 (d, *J* = 8.0 Hz, 2H), 7.19 (d, *J* = 8.4 Hz, 2H), 2.44 (s, 3H), 2.36 (s, 3H). <sup>13</sup>C NMR (101 MHz, CDCl<sub>3</sub>, ppm): δ 165.6, 142.2, 135.5, 134.1, 132.2, 129.6, 129.4, 127.0, 120.2, 21.5, 20.9. HRMS *m/z* (ESI) calcd. for C<sub>15</sub>H<sub>15</sub>NO<sub>3</sub> (M+Na)<sup>+</sup>: 248.1051, found 248.1024.

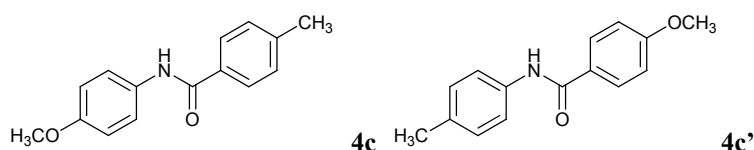

**N-(4-Methoxyphenyl)-*p*-toluamide (4c)<sup>10</sup>**

**4-Methoxy-N-(*p*-tolyl)benzamide (4c')<sup>9</sup>**

Condition B. Eluent: petroleum ether/ethyl acetate (15:1). White solid (93% yield); **4c**: <sup>1</sup>H NMR (400 MHz, CDCl<sub>3</sub>, ppm): δ 7.86 (s, 1H), 7.85 (d, *J* = 8.0 Hz, 2H), 7.54 (d, *J* = 8.8 Hz, 2H), 7.17 (d, *J* = 8.0 Hz, 2H), 6.91 (d, *J* = 8.4 Hz, 2H), 3.83 (s, 3H), 2.43 (s, 3H). **4c'**: <sup>1</sup>H NMR (400 MHz, CDCl<sub>3</sub>, ppm): δ 7.86 (s, 1H), 7.85 (d, *J* = 7.6 Hz, 2H), 7.53 (d, *J* = 8.8 Hz, 2H), 7.27 (d, *J* = 8.0 Hz, 2H), 6.96 (d, *J* = 8.8 Hz, 2H), 3.88 (s, 3H), 2.35 (s, 3H). <sup>13</sup>C NMR (101 MHz, CDCl<sub>3</sub>, ppm): δ 165.6, 165.2, 162.4, 156.5, 142.2, 135.6, 134.0, 132.2, 131.2, 129.5, 129.4, 128.9, 127.3, 127.0, 122.1, 120.3, 114.2, 113.9, 55.5, 21.5, 20.9. HRMS *m/z* (ESI) calcd. for C<sub>15</sub>H<sub>15</sub>NO<sub>2</sub> (M+Na)<sup>+</sup>: 264.1000, found 264.1028.

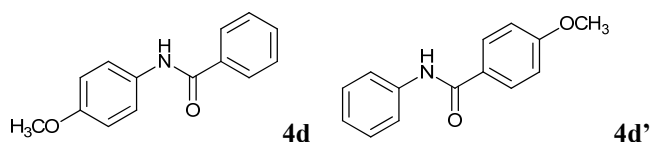

***N*-(4-Methoxyphenyl)benzamide (4d)**<sup>11</sup>

**4-Methoxy-*N*-phenylbenzamide (4d')**<sup>12</sup>

Condition B. Eluent: petroleum ether/ethyl acetate (15:1). White solid (87% yield); **4d**: <sup>1</sup>H NMR (400 MHz, CDCl<sub>3</sub>, ppm): δ 7.88 (d, *J* = 7.2 Hz, 2H), 7.83 (br, 1H), 7.65 (d, *J* = 8.0 Hz, 1H), 7.56 (d, *J* = 8.8 Hz, 2H), 7.50 (d, *J* = 8.8 Hz, 1H), 7.38 (t, *J* = 7.6 Hz, 2H), 6.93 (d, *J* = 8.8 Hz, 1H), 3.84 (s, 3H). **4d'** <sup>1</sup>H NMR (400 MHz, CDCl<sub>3</sub>, ppm): δ 7.86 (d, *J* = 8.8 Hz, 2H), 7.83 (br, 1H), 7.65 (d, *J* = 8.0 Hz, 1H), 7.56 (d, *J* = 8.8 Hz, 2H), 7.49 (d, *J* = 7.2 Hz, 1H), 7.16 (t, *J* = 7.6 Hz, 2H), 6.99 (d, *J* = 8.8 Hz, 1H), 3.89 (s, 3H). <sup>13</sup>C NMR (101 MHz, CDCl<sub>3</sub>, ppm): δ 162.5, 156.7, 138.1, 135.1, 131.7, 131.0, 129.1, 128.9, 128.8, 127.0, 124.3, 122.1, 120.2, 114.3, 114.0, 55.5. HRMS *m/z* (ESI) calcd. for C<sub>14</sub>H<sub>13</sub>NO<sub>2</sub> (M+Na)<sup>+</sup>: 250.0844, found 250.0828.

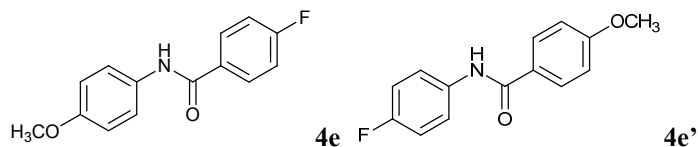

**4-Fluoro-*N*-(4-Methoxyphenyl)benzamide (4e)**<sup>13</sup>

**4-Methoxy-*N*-(4-fluorophenyl)benzamide (4e')**<sup>14</sup>

Condition B. Eluent: petroleum ether/ethyl acetate (15:1). White solid (61% yield); **4e**: <sup>1</sup>H NMR (400 MHz, CDCl<sub>3</sub>, ppm): δ 7.86 (br, 1H), 7.85 (d, *J* = 7.6 Hz, 2H), 7.60 (d, *J* = 7.6 Hz, 2H), 7.06 (t, *J* = 8.0 Hz, 2H), 6.98 (d, *J* = 8.0 Hz, 2H), 3.89 (s, 3H). **4e'** <sup>1</sup>H NMR (400 MHz, CDCl<sub>3</sub>, ppm): δ 7.86 (br, 1H), 7.85 (d, *J* = 7.6 Hz, 2H), 7.53 (d, *J* = 7.2 Hz, 2H), 7.16 (t, *J* = 8.0 Hz, 2H), 6.92 (d, *J* = 8.8 Hz, 2H), 3.83 (s, 3H). <sup>13</sup>C NMR (101 MHz, CDCl<sub>3</sub>, ppm): δ 165.2, 162.6, 160.7, 158.1, 131.2, 130.8, 129.4, 129.3, 128.9, 126.9, 122.2, 122.1, 122.0, 115.9, 115.8, 115.7, 115.6, 114.3, 114.0, 55.5. HRMS *m/z* (ESI) calcd. for C<sub>14</sub>H<sub>12</sub>FNO<sub>2</sub> (M+Na)<sup>+</sup>: 268.0750, found 268.0731.

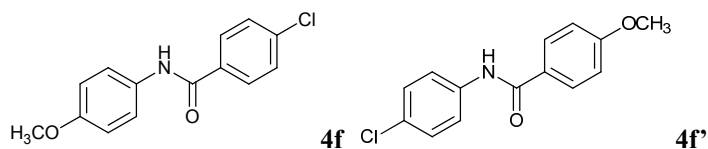

**4-Chloro-*N*-(4-Methoxyphenyl)benzamide (4f)**<sup>14</sup>

**4-Methoxy-*N*-(4-chlorophenyl)benzamide (4f')**<sup>9</sup>

Condition B. Eluent: petroleum ether/ethyl acetate (15:1). White solid (73% yield); **4f**: <sup>1</sup>H NMR (400 MHz, CDCl<sub>3</sub>, ppm): δ 7.83 (d, *J* = 9.2 Hz, 2H), 7.76 (br, 1H), 7.61 (d, *J* = 8.4 Hz, 1H), 7.54 (d, *J* = 8.0 Hz, 1H), 7.47 (d, *J* = 7.6 Hz, 1H), 7.34 (d, *J* = 8.0 Hz, 2H), 6.93 (d, *J* = 8.0 Hz, 1H), 3.84 (s, 3H). **4f'** <sup>1</sup>H NMR (400 MHz, CDCl<sub>3</sub>, ppm): δ 7.85 (d, *J* = 9.2 Hz, 2H), 7.76 (br, 1H), 7.61 (d, *J* = 8.4 Hz, 1H), 7.54 (d, *J* = 8.0 Hz, 1H), 7.47 (d, *J* = 7.6 Hz, 1H), 7.34 (d, *J* = 8.0 Hz, 2H), 6.99 (d, *J* = 7.6 Hz, 1H), 3.90 (s, 3H). <sup>13</sup>C NMR (101 MHz, CDCl<sub>3</sub>, ppm): δ 165.4, 164.4, 162.5, 156.1, 138.8, 136.7, 134.2, 132.5, 130.1, 130.0, 128.9, 127.5, 127.2, 122.5, 122.3, 114.2, 114.1, 55.9, 55.7. HRMS *m/z* (ESI) calcd. for C<sub>14</sub>H<sub>12</sub>ClNO<sub>2</sub> (M+Na)<sup>+</sup>: 284.0405, found 250.0448.

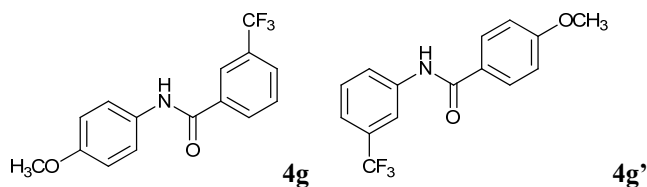

**3-Trifluoromethyl-*N*-(4-Methoxyphenyl)benzamide (4g)**

**4-Methoxy-*N*-(3-(trifluoromethyl)phenyl)benzamide (4g')**

Condition B. Eluent: petroleum ether/ethyl acetate (15:1). White solid (38% yield); **4g**: <sup>1</sup>H NMR (400 MHz, CDCl<sub>3</sub>, ppm): δ 8.14 (br, 1H), 8.08 (d, *J* = 7.6 Hz, 1H), 7.83 (d, *J* = 7.6 Hz, 2H), 7.65 (t, *J* = 8.0 Hz, 1H), 7.57 (d, *J* = 8.8 Hz, 2H), 6.95 (d, *J* = 8.8 Hz, 2H), 3.85 (s, 3H). **4g'** <sup>1</sup>H NMR (400 MHz, CDCl<sub>3</sub>, ppm): δ 7.95 (br, 1H), 7.91-7.86 (m, 3H), 7.83 (d, *J* = 7.6 Hz, 1H), 7.51 (t, *J* = 8.0 Hz, 1H), 7.41 (d, *J* = 7.6 Hz, 1H), 7.01 (d, *J* = 8.8 Hz, 2H), 3.85 (s, 3H).

**4. References**

- (a) T. Ishikawa, M. Kawakami, M. Fukui, A. Yamashita, J. Urano, S. Saito, *Journal of the American Chemical Society*, 2001, **123**, 7734; (b) Z. Liu, Z. Cao, H. Du, *Organic & Biomolecular Chemistry*, 2011, **9**, 5369.
- S. Liu, L. S. Liebeskind, *Journal of the American Chemical Society*, 2008, **130**, 6918.
- (a) M. A. Ali, P. Saha, T. Punniyamurthy, *Synthesis* 2010, **2010**, 908; (b) C. Qin, W. Zhou, F. Chen, Y. Ou, N. Jiao, *Angew. Chem. Int. Ed.* 2011, **50**, 12595.
- S. Ueda, T. Okada, H. Nagasawa, *Chemical Communications* 2010, **46**, 2462.
- Y. Ma, C. Song, Q. Chai, C. Ma, M. B. Andrus, *Synthesis* 2003, **18**, 2886.
- L. Legoabe, J. Kruger, A. Petzer, J. J. Bergh, J. P. Petzer, *European Journal of Medicinal Chemistry*, 2011, **46**, 5162.
- A. H. Blatt, R. P. Barnes, *Journal of the American Chemical Society*, 1934, **56**, 1148.
- R. D. Parra, H. Zeng, J. Zhu, C. Zheng, X. C. Zeng, B. Gong, *Chemistry-A European Journal* 2001, **7**, 4352.
- Y. Wu, S. Wang, L. Zhang, G. Yang, X. Zhu, Z. Zhou, H. Zhu, S. Wu, *European Journal of Organic Chemistry* 2010, **2**, 326.
- S. Hwang, S. Y. Choi, J. H. Lee, S. Kim, J. In, S. K. Ha, E. Lee, T. Y. Kim, S. Y. Kim, S. Choi, S. Kim, *Bioorganic & Medicinal Chemistry* 2010, **18**, 5602.
- C. K. Lee, J. S. Yu, Y. R. Ji, *Journal of Heterocyclic Chemistry* 2002, **39**, 1219.
- L. Zhang, S. Su, H. Wu, S. Wang, *Tetrahedron* 2009, **65**, 10022.
- K. Serdons, C. Terwinghe, P. Vermaelen, K. Van Laere, H. Kung, L. Mortelmans, G. Bormans, A. Verbruggen, *Journal of Medicinal Chemistry* 2009, **52**, 1428.
- Q. L. Dong, G. S. Liu, H. B. Zhou, L. Chen, Z. J. Yao, *Tetrahedron Letters* 2008, **49**, 1636.

## 5. NMR Charts

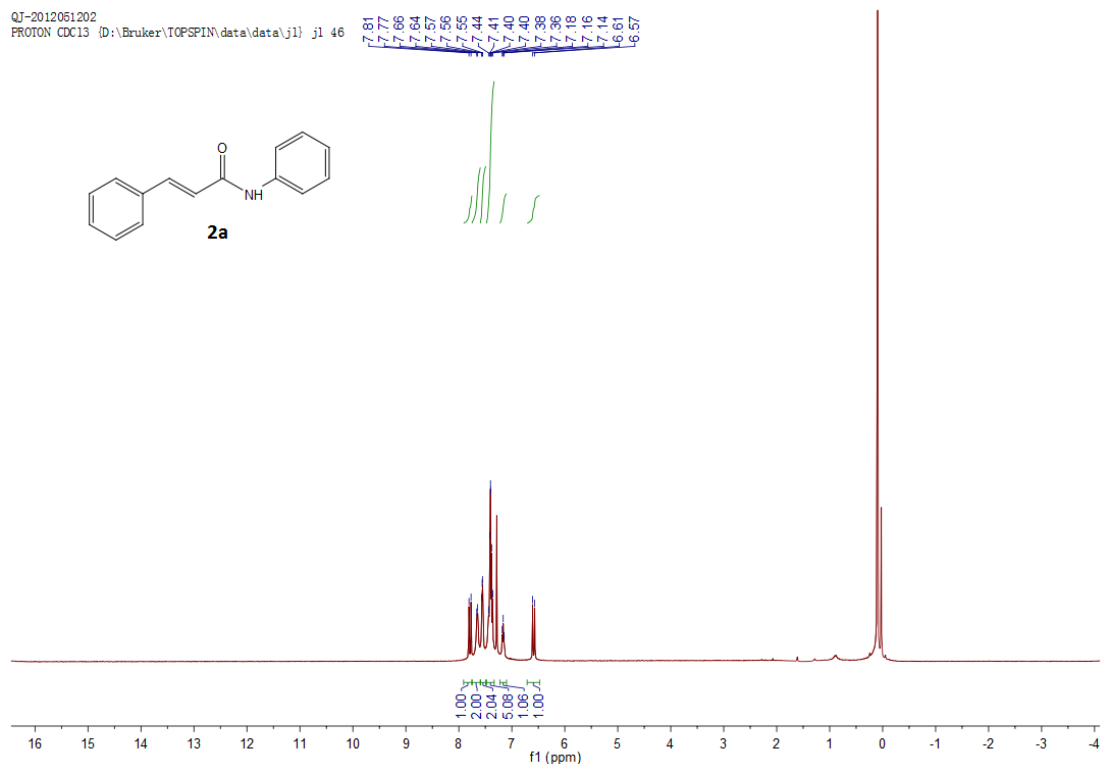



qj-12110701c

C13CPD CDC13 (D:\Bruker\TOPSPIN\data\topsp) nmr 5

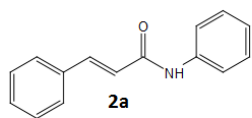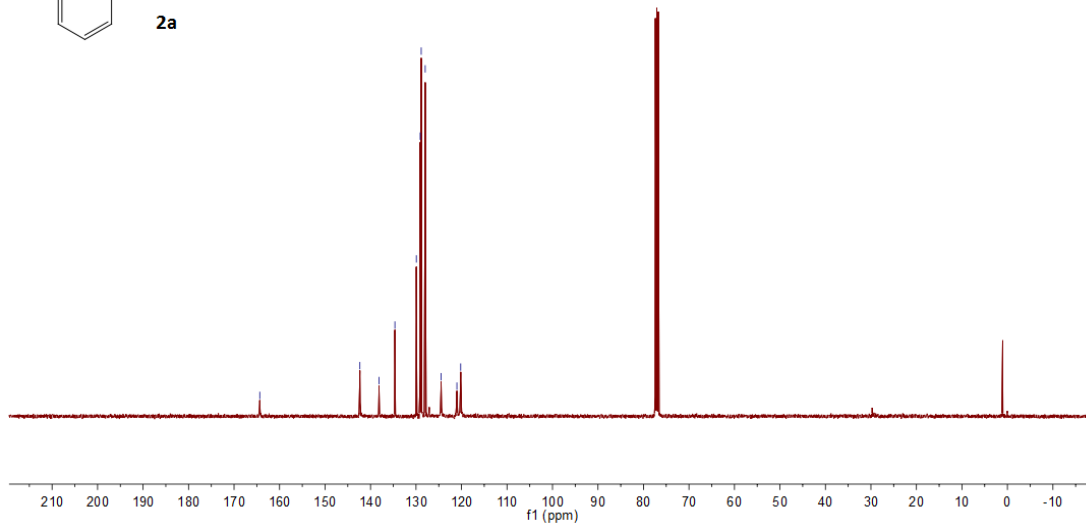

qj-120620

PROTON CDC13 (D:\Bruker\TOPSPIN\data\data\11q) 11q 24

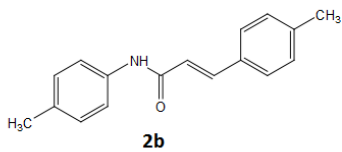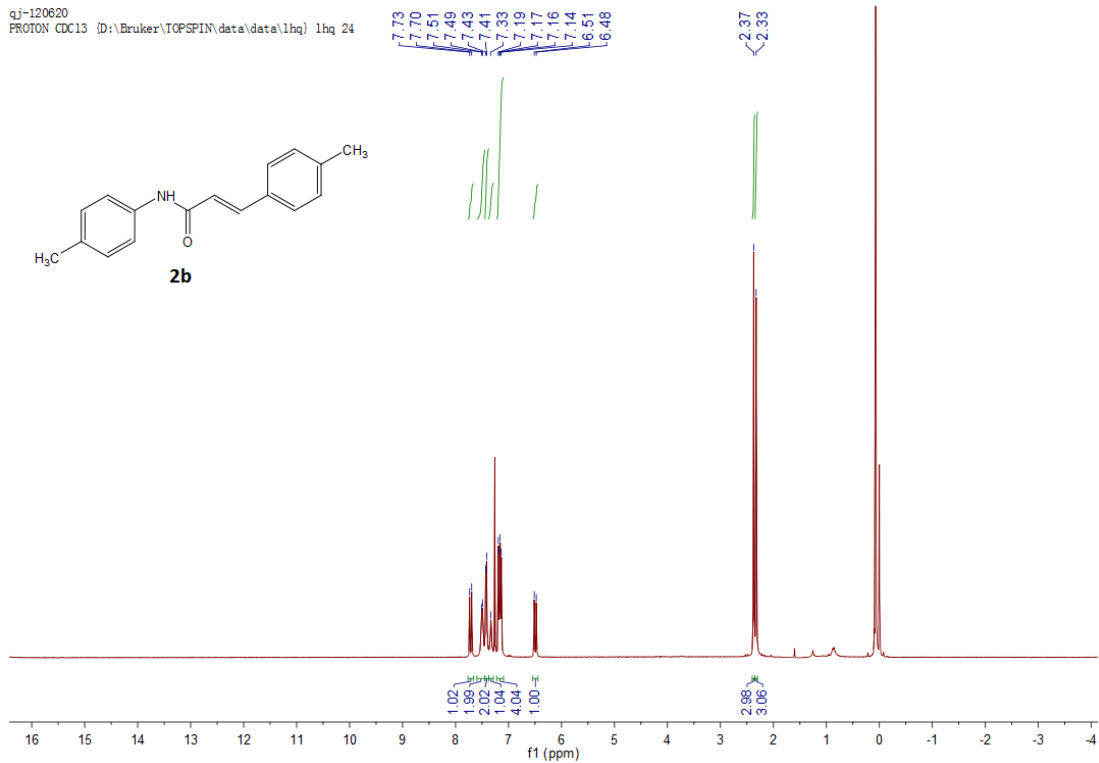

qj-1206201c  
C13CPD CDC13

(D:\Bruker\TOPSPIN\data\jhh\} nmr 4

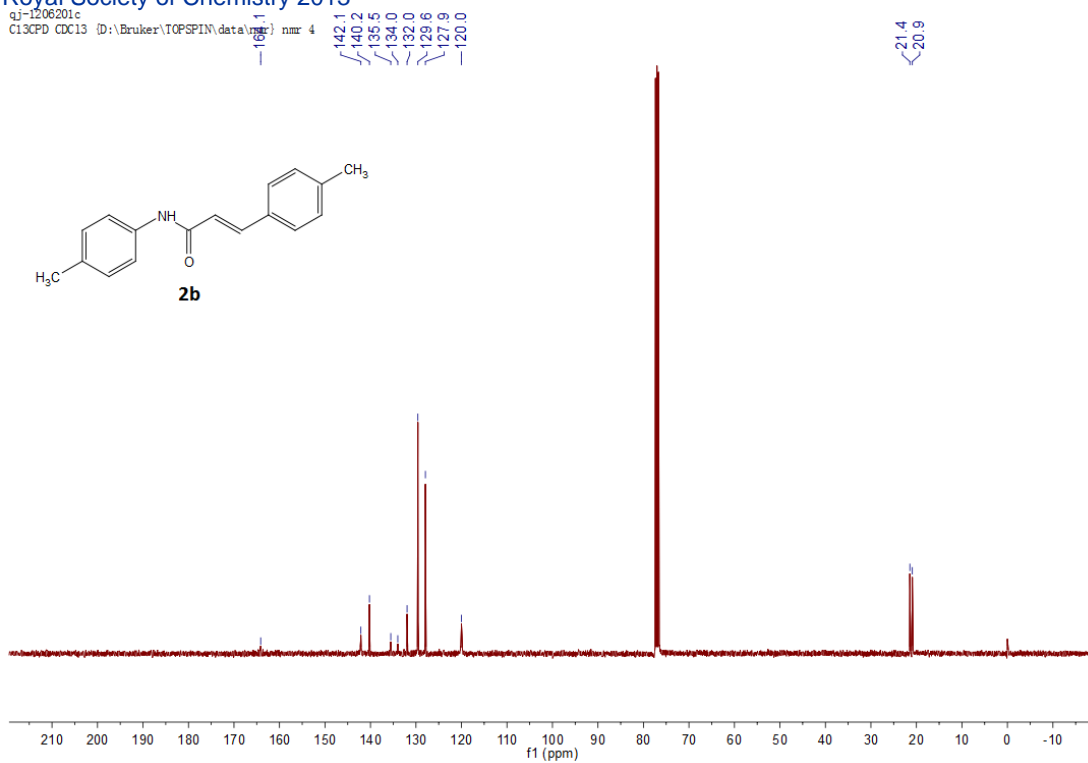

qj-121-8-2  
PROTON CDC13

(D:\Bruker\TOPSPIN\data\data\jhh\} jh 28

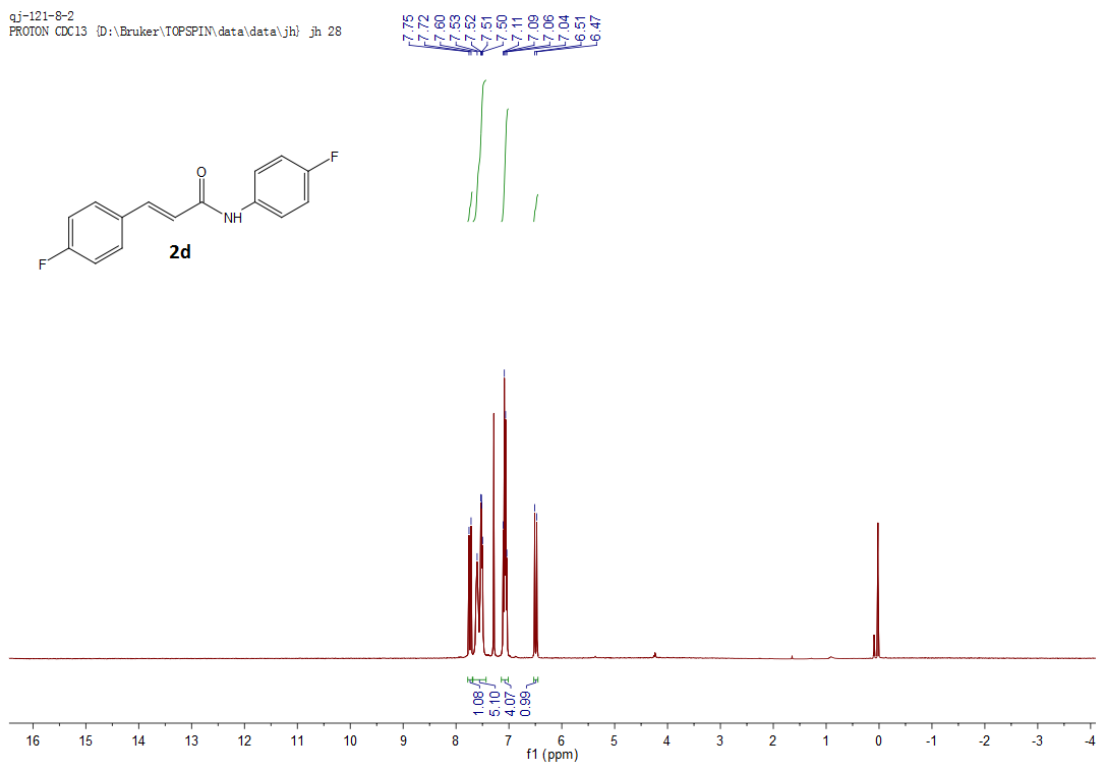

qj-12101001c  
C13CPD CDC13

(D:\Bruker\TOPSPIN\data\data\j1]

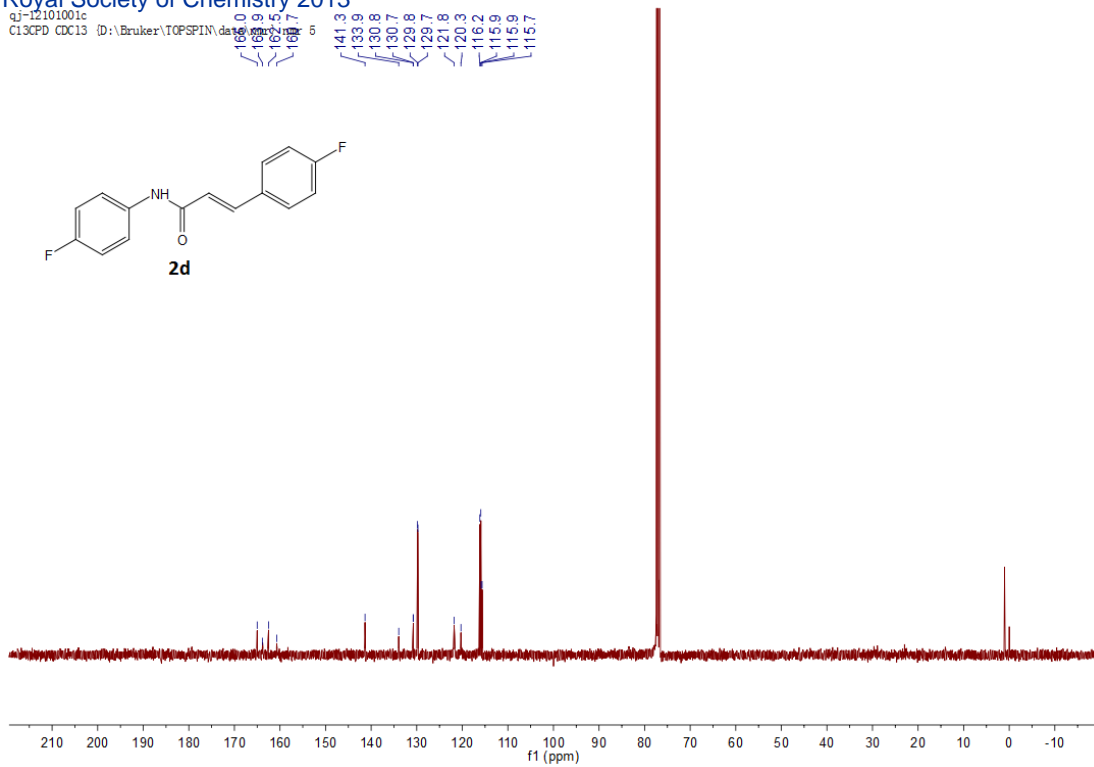

qj-12101002

PROTON CDC13 (D:\Bruker\TOPSPIN\data\data\j1]

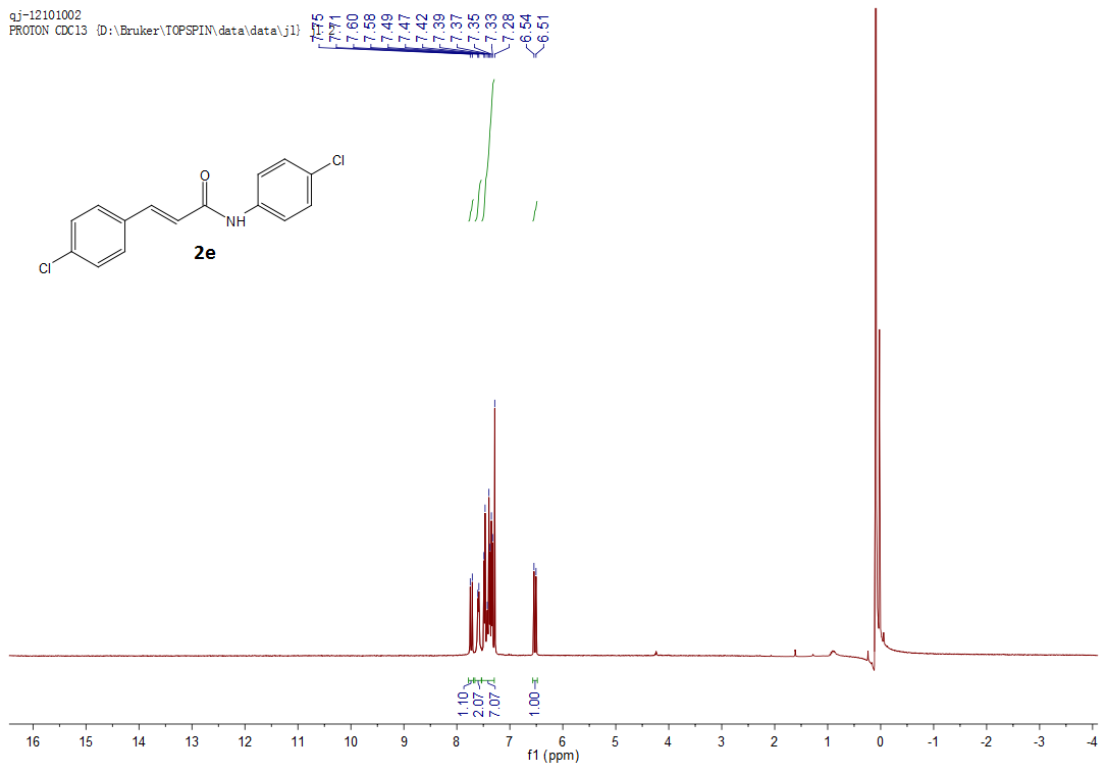

qj-1210102c

C13CPD DMSO

(D:\Bruker\TOPSPIN\data\rnmr 2

nmr 2

136.6

134.8

134.1

129.9

129.5

129.2

127.5

123.3

121.2

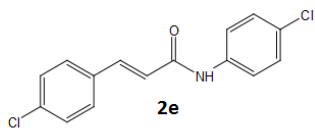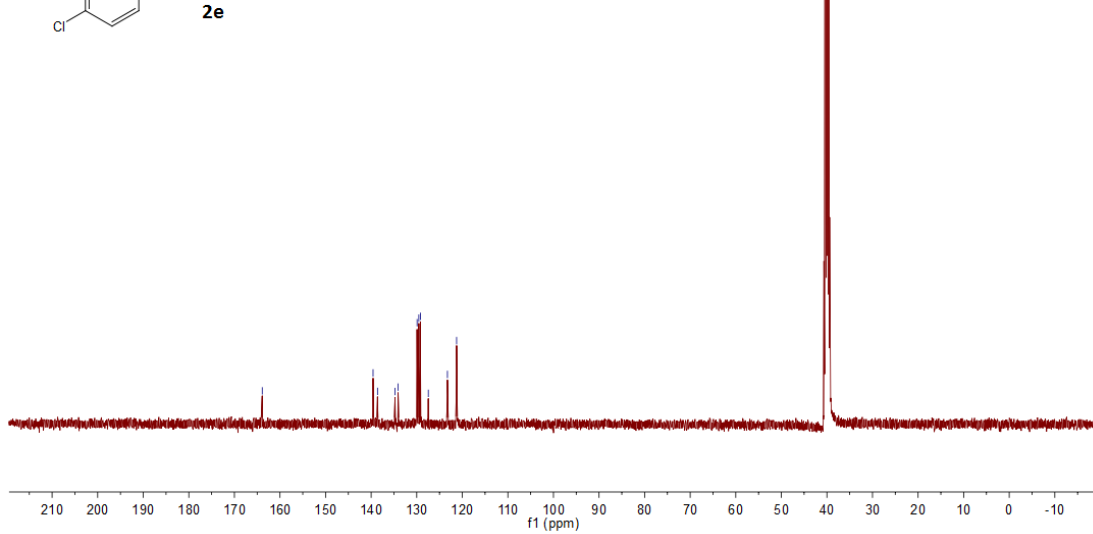

qj-12101003

PROTON CDC13

(D:\Bruker\TOPSPIN\data\data\j1

j1 1

7.73

7.70

7.56

7.54

7.50

7.47

7.43

7.41

7.36

7.28

6.55

6.51

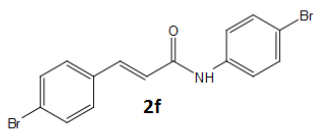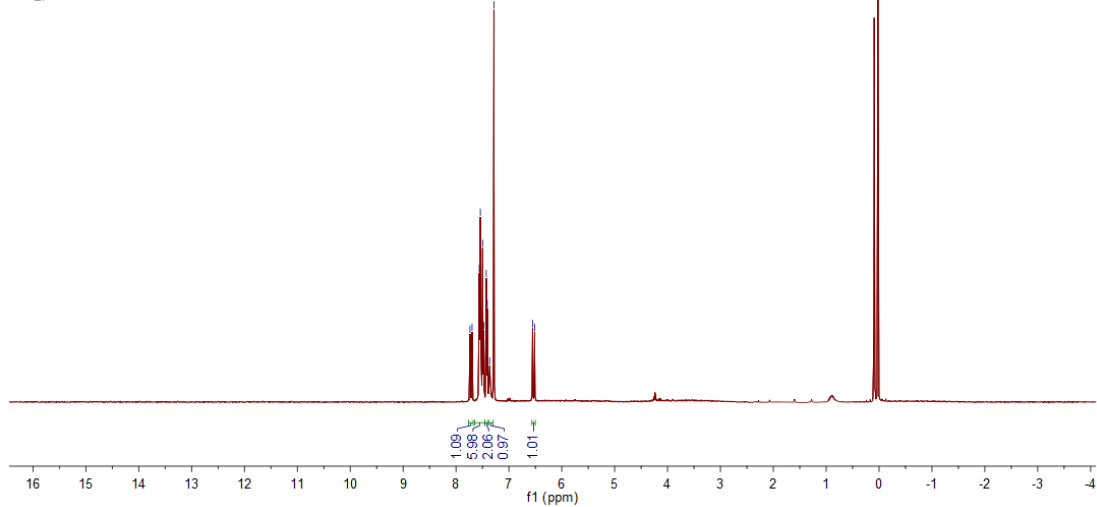

qj-12101003c

C13CPD DMSO (D:\Bruker\TOPSPIN\data\msd) rnr 1

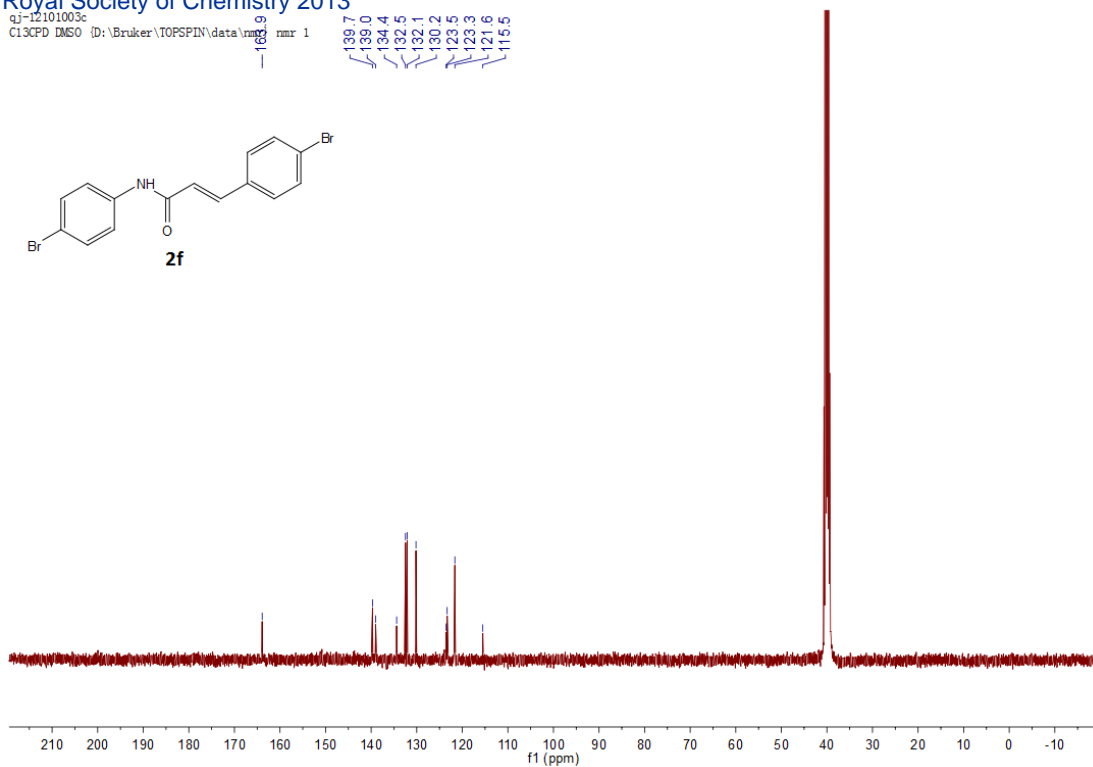

qj-12092101

PROTON CDC13 (D:\Bruker\TOPSPIN\data\data\1h)

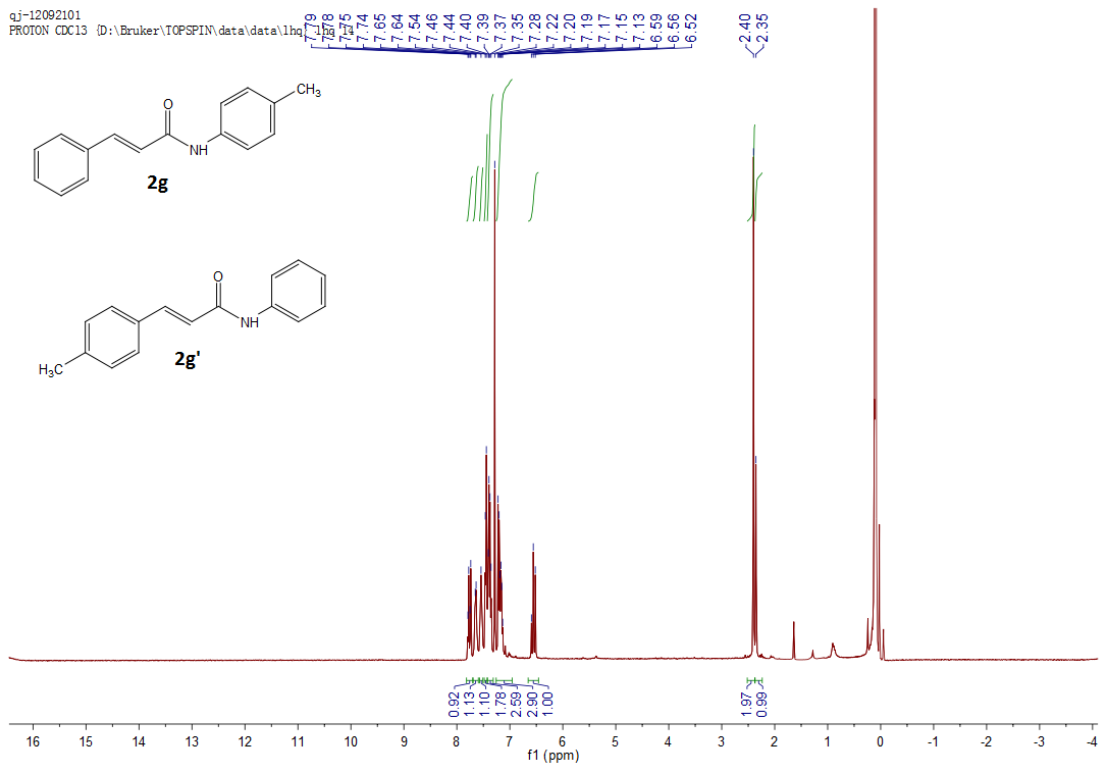

qj-12102501

PROTON CDC13 (D:\Bruker\TOPSPIN\data\data1zsc)

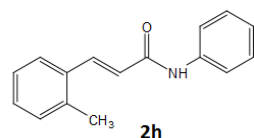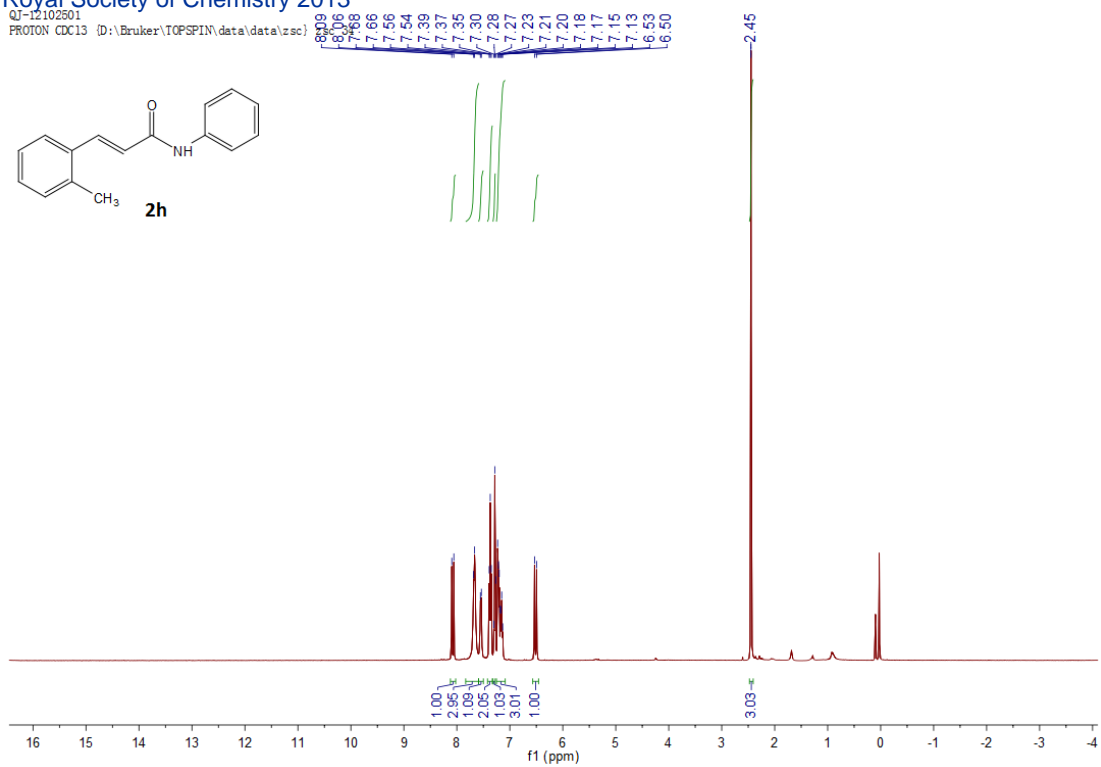

qj-12102501C

C13CPD CDC13 (D:\Bruker\TOPSPIN\data\data1zsc)

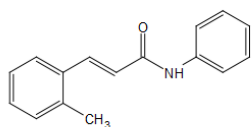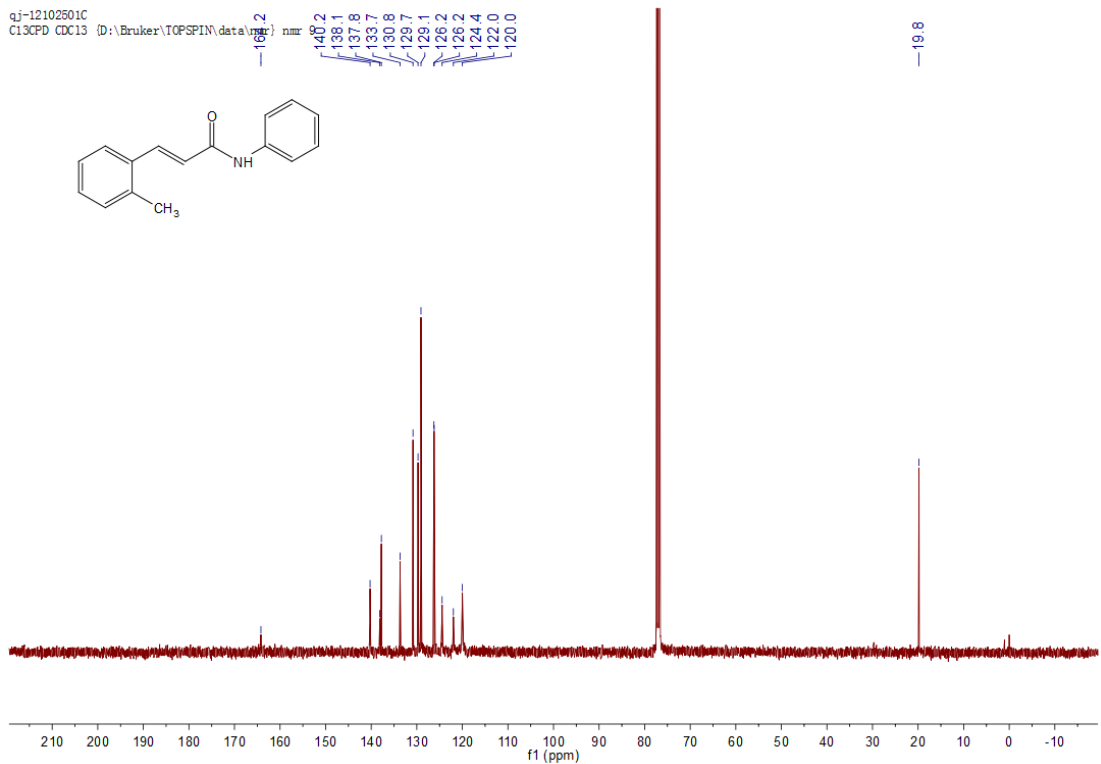

qj-12102502  
PROTON CDC13 (D:\Bruker\TOPSPIN\data\data\zsc) zsc 35

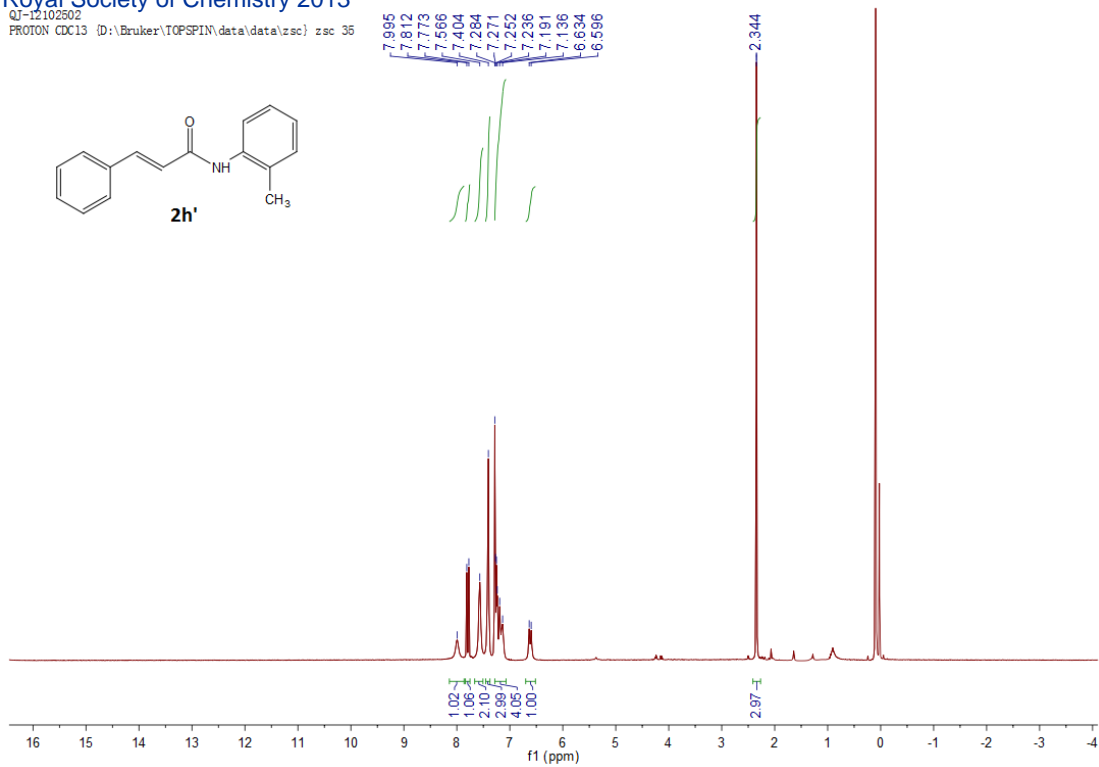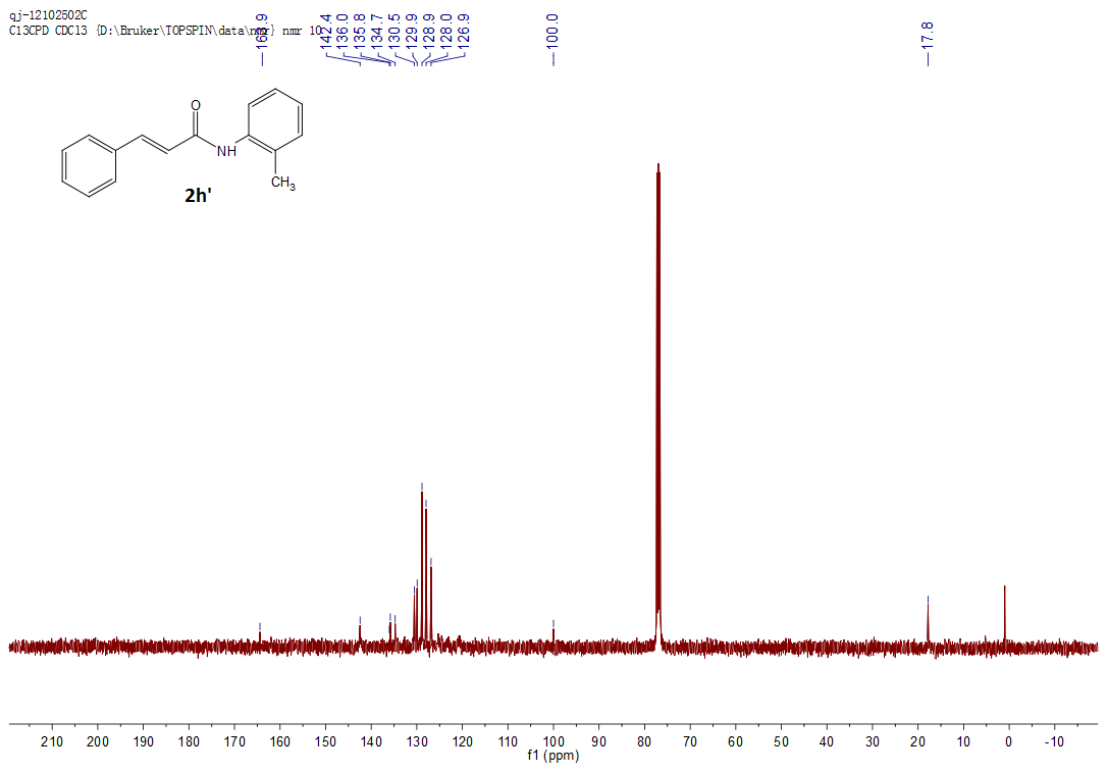

qj-12061401  
PROTON CDC13 (D:\Bruker\TOPSPIN\data\nmr) nmr 60

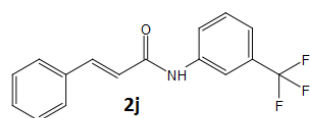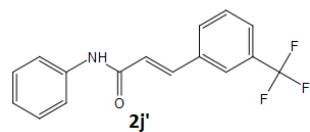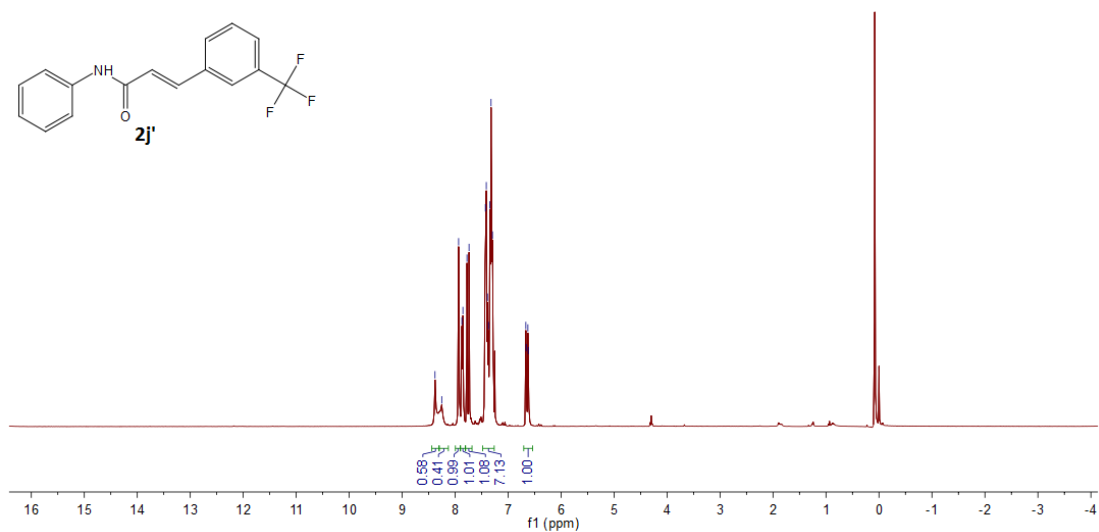

qj-1210802  
PROTON CDC13 (D:\Bruker\TOPSPIN\data\data) nmr 60

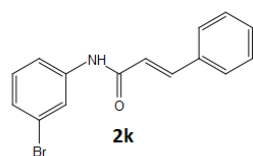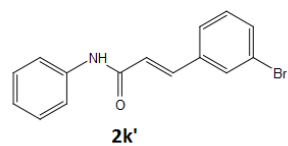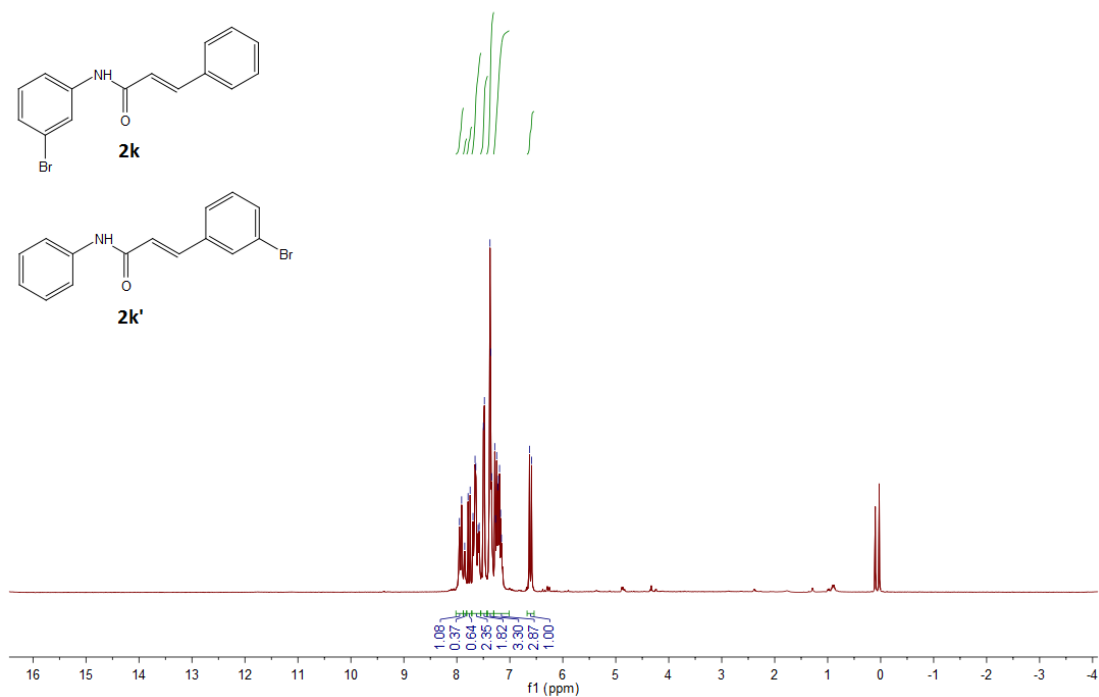



qj-120623

PROTON CDC13 (D:\Bruker\TOPSPIN\data\data1

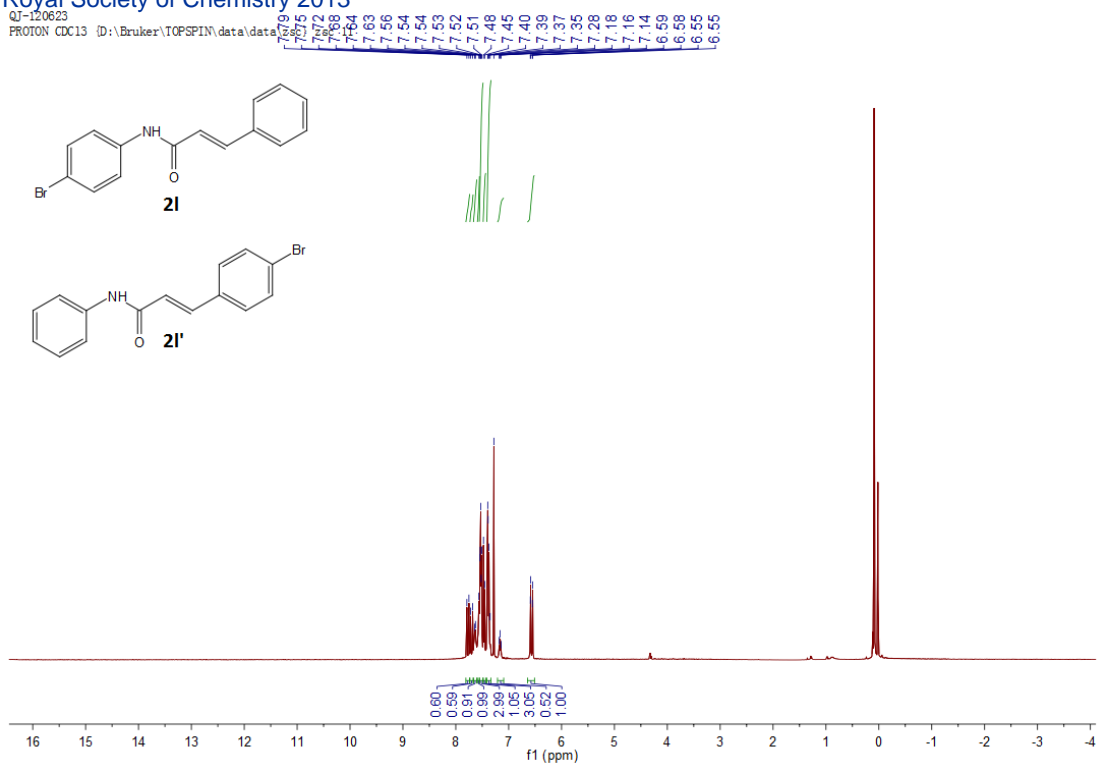

qj-12092502

PROTON CDC13 (D:\Bruker\TOPSPIN\data\data1

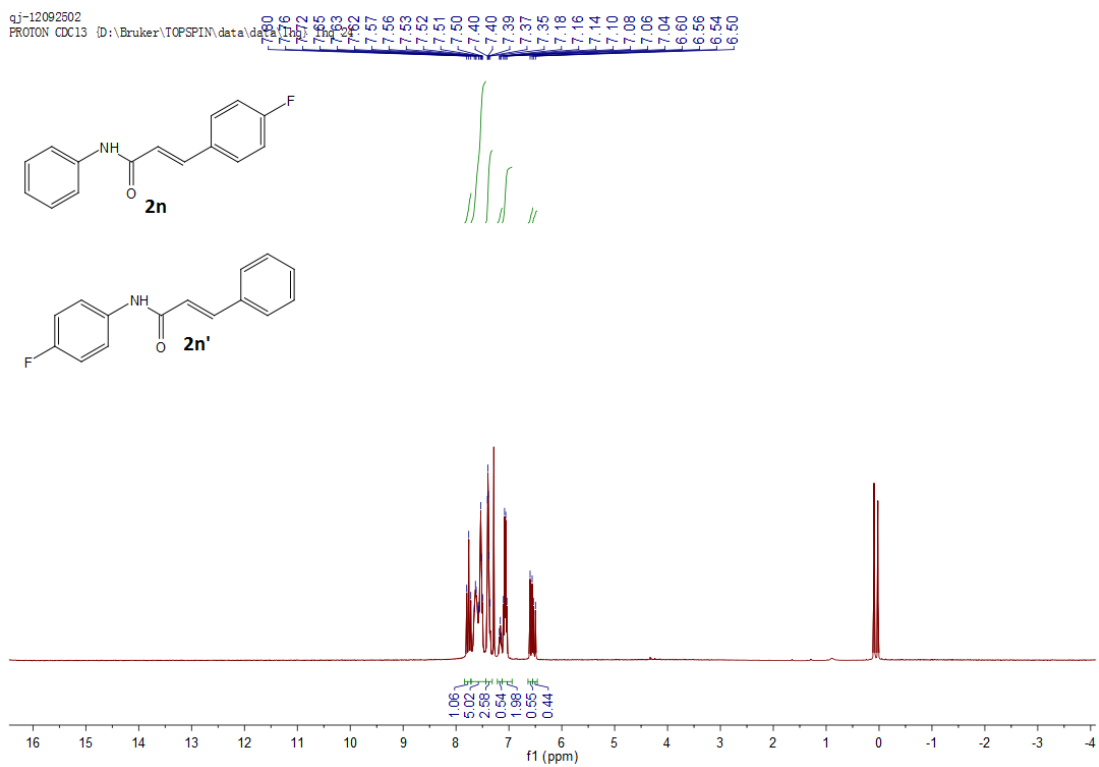

qj-12113001  
PROTON CDC13 (D:\Bruker\TOPSPIN\data\data\j1) j1 40

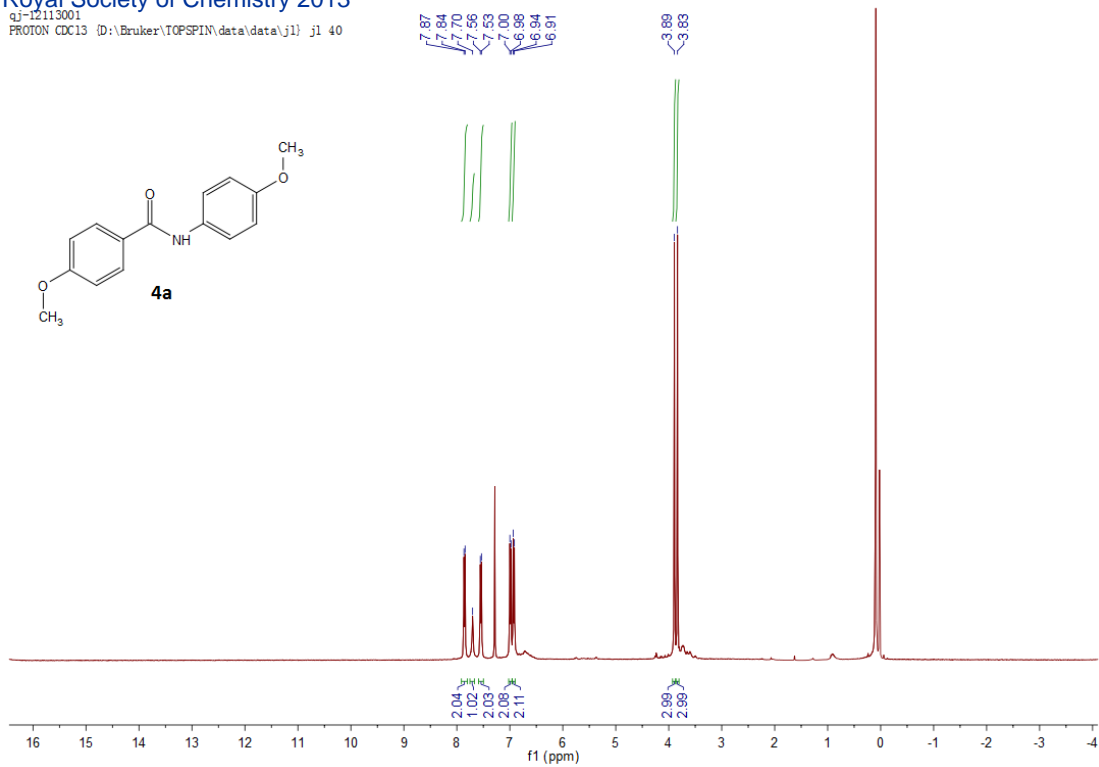

qj-13040402c  
C13CPD DMSO (D:\Bruker\TOPSPIN\data\data\j1) j1 14

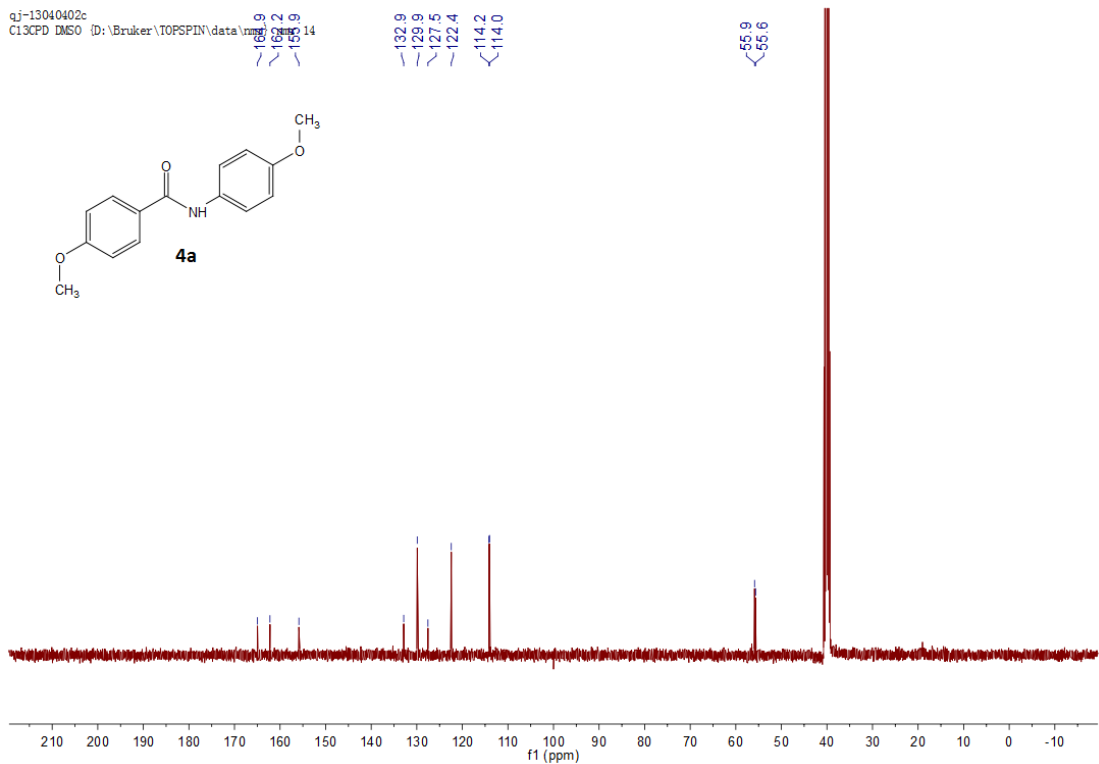

qj-13022601  
PROTON CDC13 (D:\Bruker\TOPSPIN\data\data\zsc) zsc 43

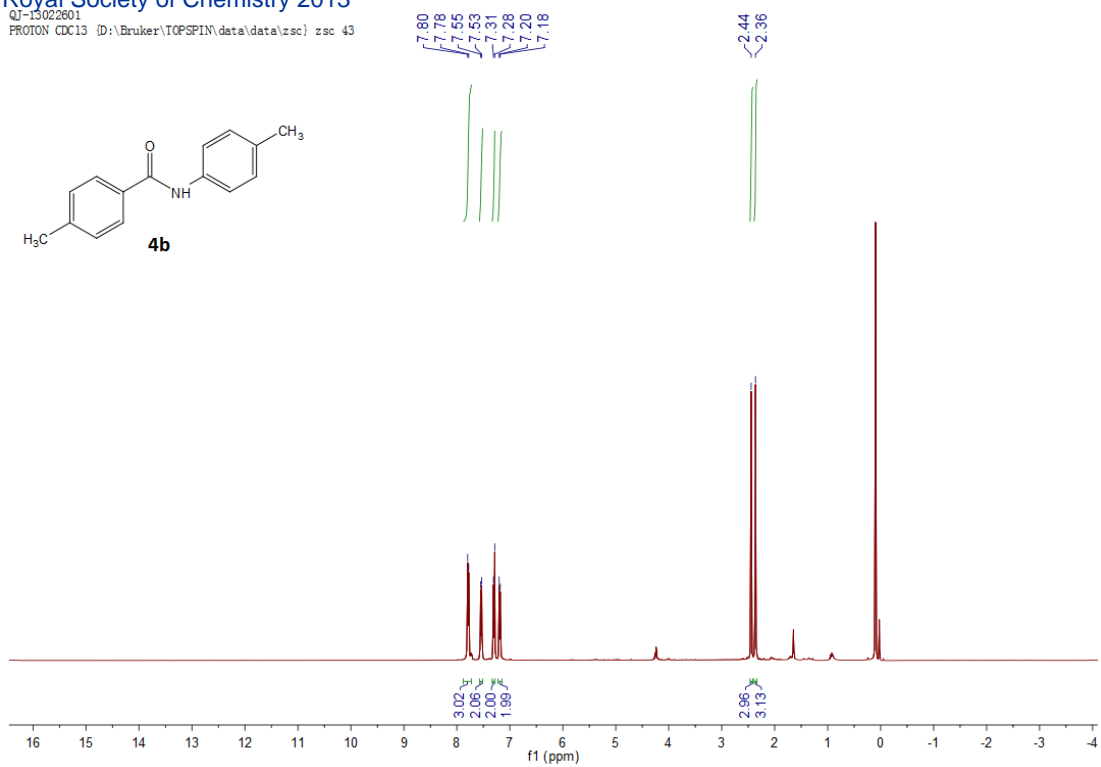

qj-130226c  
C13CPD CDC13 (D:\Bruker\TOPSPIN\data\data\zsc) nmr 57

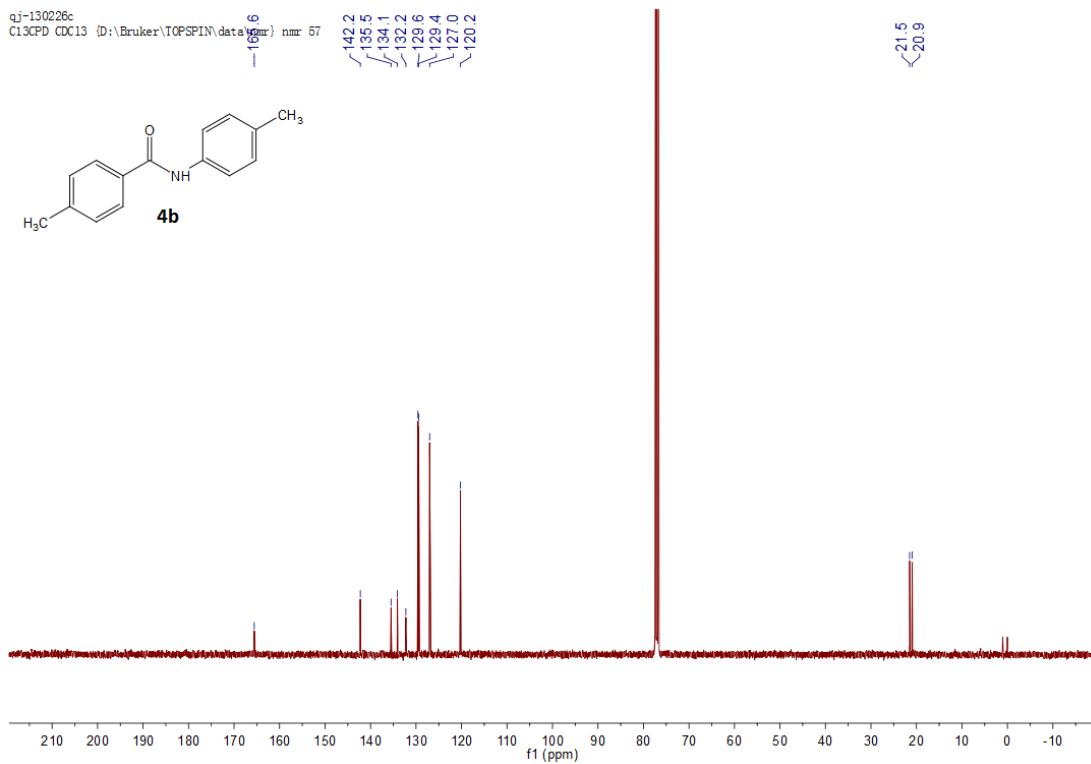

QJ-121231  
PROTON CDC13 (D:\Bruker\TOPSPIN\data\data\wvn) suteng

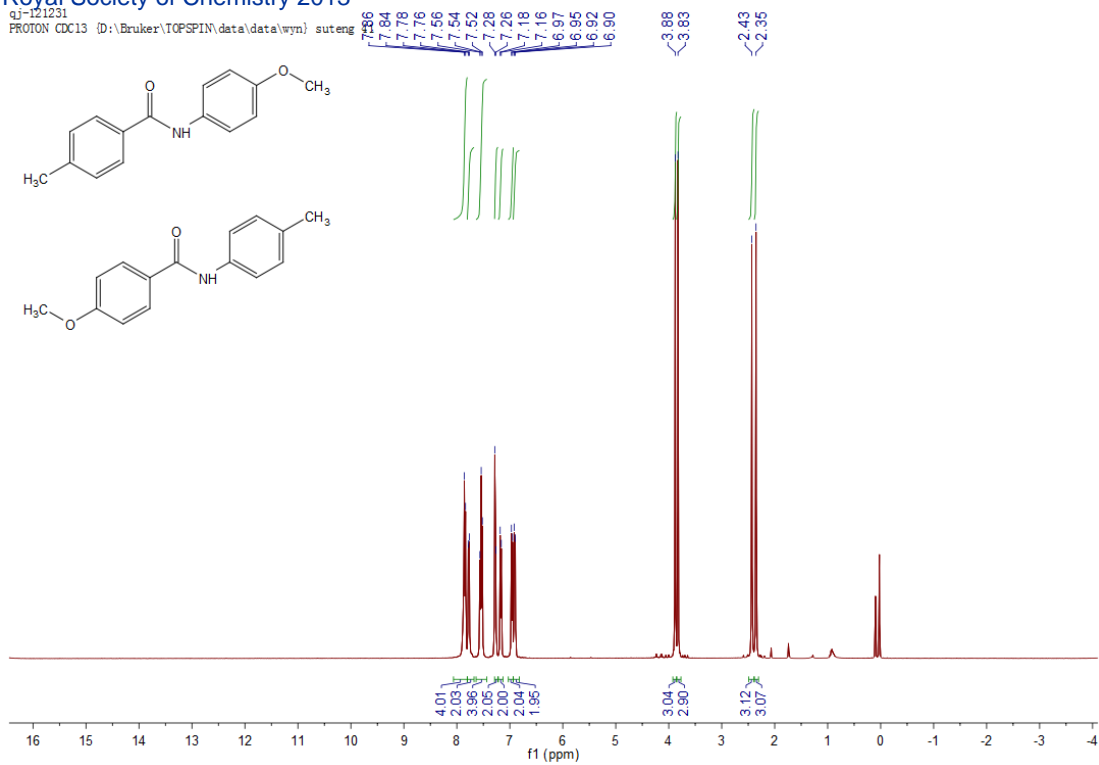

QJ12120501  
PROTON CDC13 (D:\Bruker\TOPSPIN\data\data\wvn)

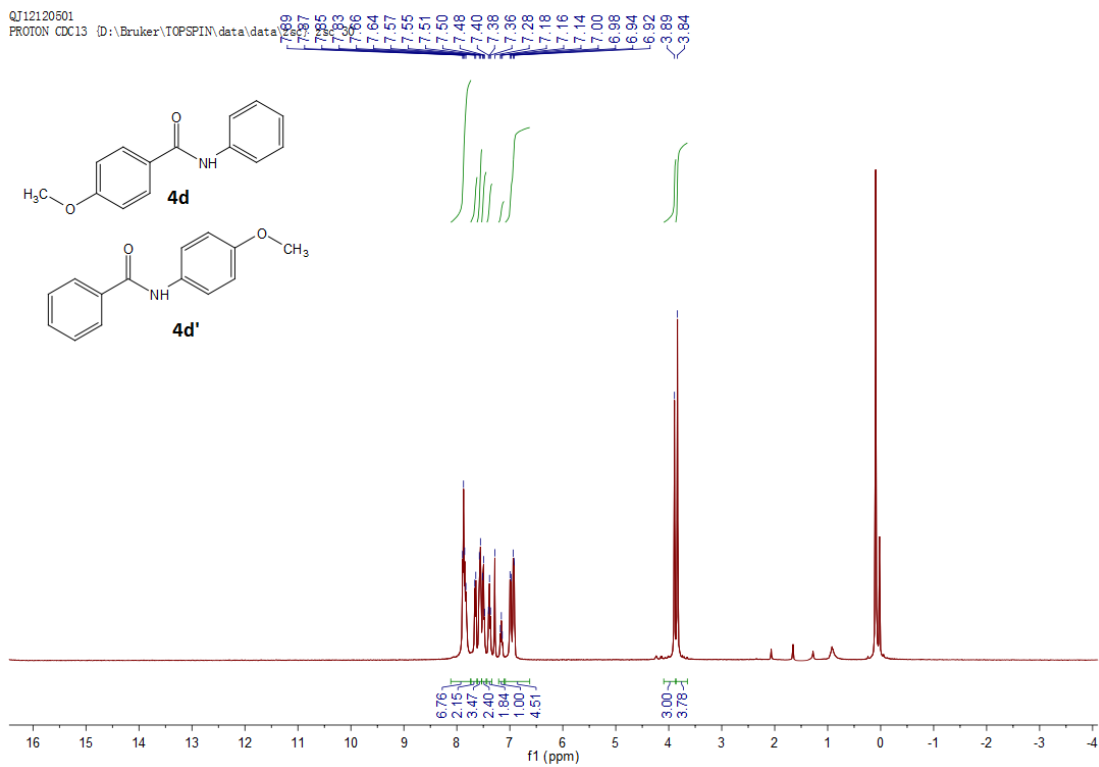

qj-12122301  
PROTON CDC13 (D:\Bruker\TOPSPIN\data\data\zsc) zsc 19

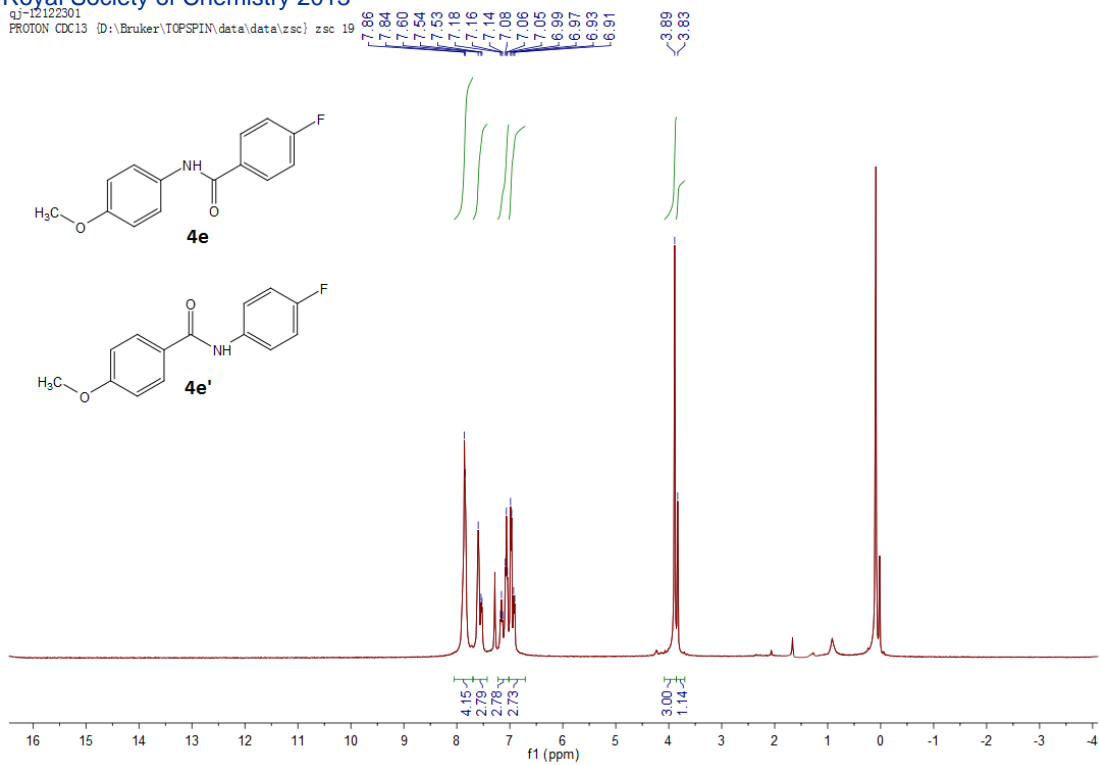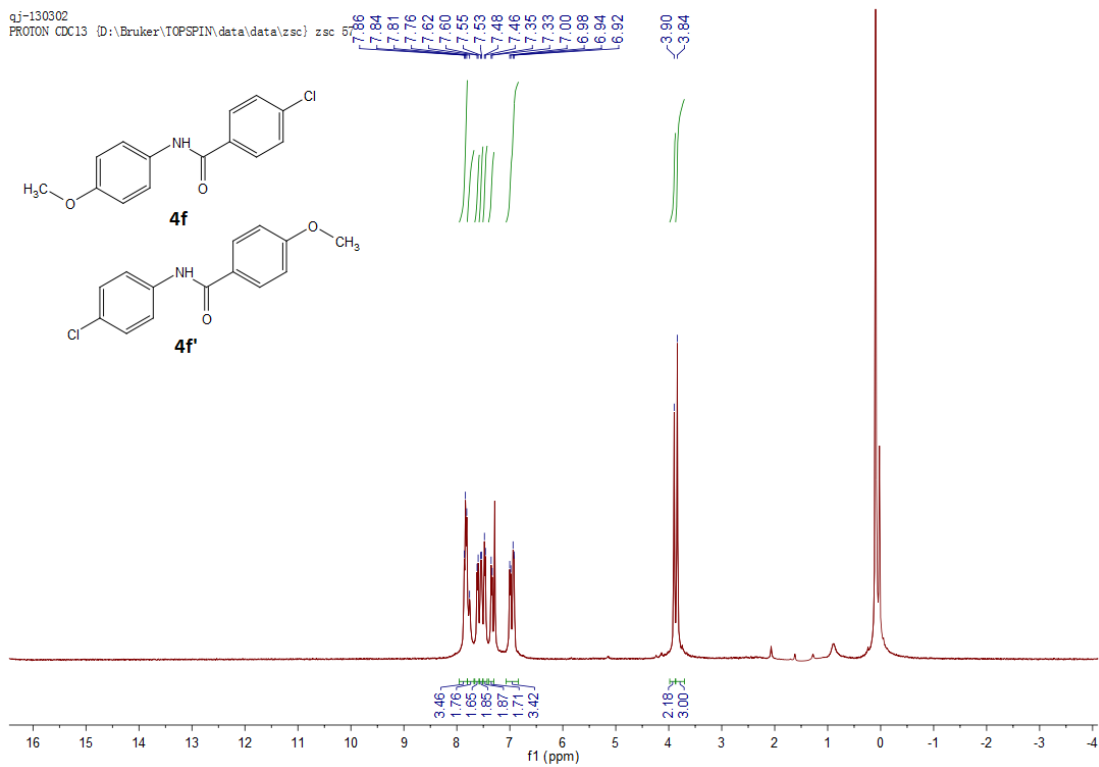

qj-12122801

PROTON CDC13

(D:\Bruker\TOPSPIN\data\14

000001

7.930

7.917

7.891

7.889

7.866

7.822

7.677

7.665

7.63

7.58

7.56

7.53

7.51

7.49

7.42

7.40

7.28

7.02

7.00

6.96

6.93

3.91

3.85

0.00

0.00

0.00

0.00

0.00

0.00

0.00

0.00

0.00

0.00

0.00

0.00

0.00

0.00

0.00

0.00

0.00

0.00

0.00

0.00

0.00

0.00

0.00

0.00

0.00

0.00

0.00

0.00

0.00

0.00

0.00

0.00

0.00

0.00

0.00

0.00

0.00

0.00

0.00

0.00

0.00

0.00

0.00

0.00

0.00

0.00

0.00

0.00

0.00

0.00

0.00

0.00

0.00

0.00

0.00

0.00

0.00

0.00

0.00

0.00

0.00

0.00

0.00

0.00

0.00

0.00

0.00

0.00

0.00

0.00

0.00

0.00

0.00

0.00

0.00

0.00

0.00

0.00

0.00

0.00

0.00

0.00

0.00

0.00

0.00

0.00

0.00

0.00

0.00

0.00

0.00

0.00

0.00

0.00

0.00

0.00

0.00

0.00

0.00

0.00

0.00

0.00

0.00

0.00

0.00

0.00

0.00

0.00

0.00

0.00

0.00

0.00

0.00

0.00

0.00

0.00

0.00

0.00

0.00

0.00

0.00

0.00

0.00

0.00

0.00

0.00

0.00

0.00

0.00

0.00

0.00

0.00

0.00

0.00

0.00

0.00

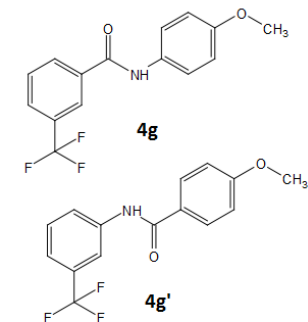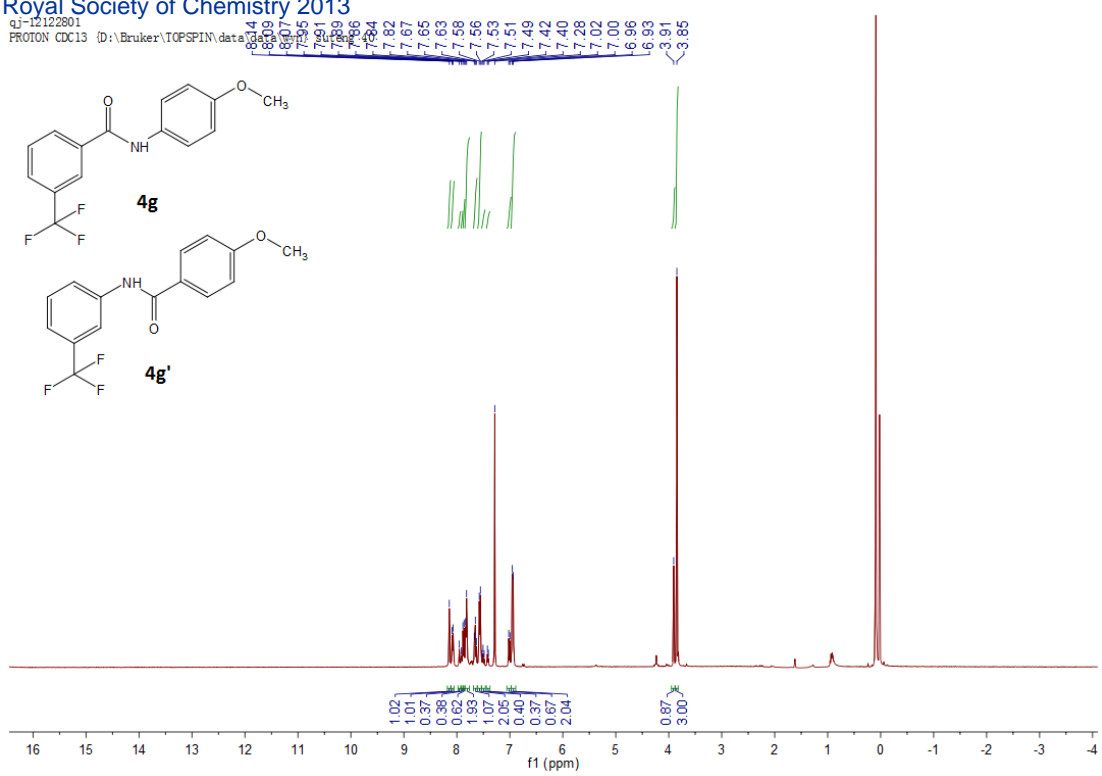

Supplement: c3ob41218k.pdf [file c3ob41218k.pdf]
